# Supplementary material for: Synthesis of Functionalized N-(4-Bromophenyl)furan-2-carboxamides via Suzuki-Miyaura Cross-Coupling: Anti-Bacterial Activities against Clinically Isolated Drug Resistant A. baumannii, K. pneumoniae, E. cloacae and MRSA and Its Validation via a Computational Approach
Source: MDPI journal article supplement (doi:10.3390/ph15070841), 2022-07-08
Supplement: s1 [file s1]

# ***N*-(4-bromophenyl)furan-2-carboxamides via Suzuki-miyaura Cross-Coupling: Anti-bacterial activities against clinically isolated drug resistant *A. baumannii*, *K. pneumoniae*, *E. cloacae* and MRSA and its validation via computational approach.**

Ayesha Siddiq<sup>1</sup>, Muhammad Zubair<sup>1,\*</sup>, Muhammad Bilal<sup>1</sup>, Nasir Rasool<sup>1</sup>, Muhammad Usman Qamar<sup>2</sup>, Aqsa khalid<sup>3</sup>, Gulraiz Ahmad<sup>1</sup>, Muhammad Imran<sup>4</sup>, Sajid Mahmood<sup>5</sup>, Ghulam Abbas Ashraf<sup>6,\*</sup>

<sup>1</sup> Department of Chemistry, Government College, University Faisalabad, 38000, Pakistan; ayeshasiddiq096@gmail.com (A.S.), zubairmkn@gcuf.edu.pk (M.Z.), muhammadbilalgucf@gmail.com (M.B.), nasirrasool@gcuf.edu.pk (N.R.), gulchemist35@gmail.com (G.A.)

<sup>2</sup> Department of Microbiology, Faculty of Life Sciences, Government College, University Faisalabad, 38000, Pakistan; musmanqamar@gcuf.edu.pk (M.U.Q.)

<sup>3</sup> School of Interdisciplinary Engineering & Science (SINES), National University of Sciences and Technology (NUST), Islamabad 44000, Pakistan; aqsa.khalid30@yahoo.com (A.K.)

<sup>4</sup> Department of Chemistry, Faculty of Science, King Khalid University, P.O. Box 9004, Abha 61413, Saudi Arabia; miahmad@kku.edu.sa (M.I.)

<sup>5</sup> Key Laboratory of the Ministry of Education for Advanced Catalysis Materials, Department of Chemistry, Zhejiang Normal University, Jinhua 312004, China; sajidmahmood1987@zjnu.edu.cn (S.M.)

<sup>6</sup> Department of Physics, Zhejiang Normal University, Jinhua, Zhejiang 312004, China; ga\_phy@yahoo.com (G.A.A.)

\* Correspondence: zubairmkn@gcuf.edu.pk, ga\_phy@yahoo.com; Tel.: (+923008923442)

## Table of Contents

|                                                                               |         |
|-------------------------------------------------------------------------------|---------|
| Figure S1: <sup>1</sup> H NMR (500 MHz, DMSO) of compound <b>3</b> .....      | S3      |
| Figure S2: <sup>1</sup> H NMR (500 MHz, DMSO) of compound <b>5a</b> .....     | S3      |
| Figure S3: <sup>13</sup> C NMR (126 MHz, DMSO) of compound <b>5a</b> .....    | S4      |
| Figure S4: <sup>1</sup> H NMR (500 MHz, DMSO) of compound <b>5b</b> .....     | S4      |
| Figure S5: <sup>13</sup> C NMR (126 MHz, DMSO) of compound <b>5b</b> .....    | S5      |
| Figure S6: <sup>1</sup> H NMR (500 MHz, DMSO) of compound <b>5c</b> .....     | S5      |
| Figure S7: <sup>1</sup> H NMR (500 MHz, DMSO) of compound <b>5d</b> .....     | S6      |
| Figure S8: <sup>13</sup> C NMR (126 MHz, DMSO) of compound <b>5d</b> .....    | S6      |
| Figure S9: <sup>1</sup> H NMR (500 MHz, DMSO) of compound <b>5e</b> .....     | S7      |
| Figure S10: <sup>13</sup> C NMR (126 MHz, DMSO) of compound <b>5e</b> .....   | S7      |
| Figure S11: <sup>1</sup> H NMR (500 MHz, DMSO) of compound <b>5f</b> .....    | S8      |
| Figure S12: <sup>1</sup> H NMR (500 MHz, DMSO) of compound <b>5g</b> .....    | S8      |
| Figure S13: <sup>13</sup> C NMR (126 MHz, DMSO) of compound <b>5g</b> .....   | S9      |
| Figure S14: <sup>1</sup> H NMR (500 MHz, DMSO) of compound <b>5h</b> .....    | S9      |
| Figure S15: <sup>13</sup> C NMR (126 MHz, DMSO) of compound <b>5h</b> .....   | S10     |
| Figure S16: <sup>1</sup> H NMR (500 MHz, DMSO) of compound <b>5i</b> .....    | S10     |
| Figure S17: MD simulation and data of compound <b>3</b> .....                 | S11     |
| Figure S18: MD simulation and data of compound <b>5a</b> .....                | S11     |
| Figure S19: MD simulation and data of compound <b>5b</b> .....                | S12     |
| Figure S20: MD simulation and data of compound <b>5c</b> .....                | S12     |
| Figure S21: MD simulation and data of compound <b>5d</b> .....                | S13     |
| Figure S22: MD simulation and data of compound <b>5e</b> .....                | S13     |
| Figure S23: MD simulation and data of compound <b>5f</b> .....                | S14     |
| Figure S24: MD simulation and data of compound <b>5g</b> .....                | S14     |
| Figure S25: MD simulation and data of compound <b>5h</b> .....                | S15     |
| Figure S26: MD simulation and data of compound <b>5i</b> .....                | S15     |
| Figure S27-S28: Binding pattern of compounds.....                             | S16,S17 |
| Figure S29: RMSD value graph of compound <b>3</b> .....                       | S18     |
| Figure S30: RMSD value graph of compound <b>5c</b> .....                      | S18     |
| Figure S31: RMSD value graph of compound <b>5g</b> .....                      | S19     |
| Figure S32: RMSD value graph of compound <b>5h</b> .....                      | S19     |
| Figure S33: RMSD value graph of compound <b>5i</b> .....                      | S20     |
| Figure S34. Antibacterial activity of ( <b>3</b> ) against XDR pathogens..... | S21     |

Figure S35. MIC (mg/ml) and MBC of compound (3) against XDR pathogens.....S21  
 Figure S36. MIC of **3** compound against XDR pathogens.....S21

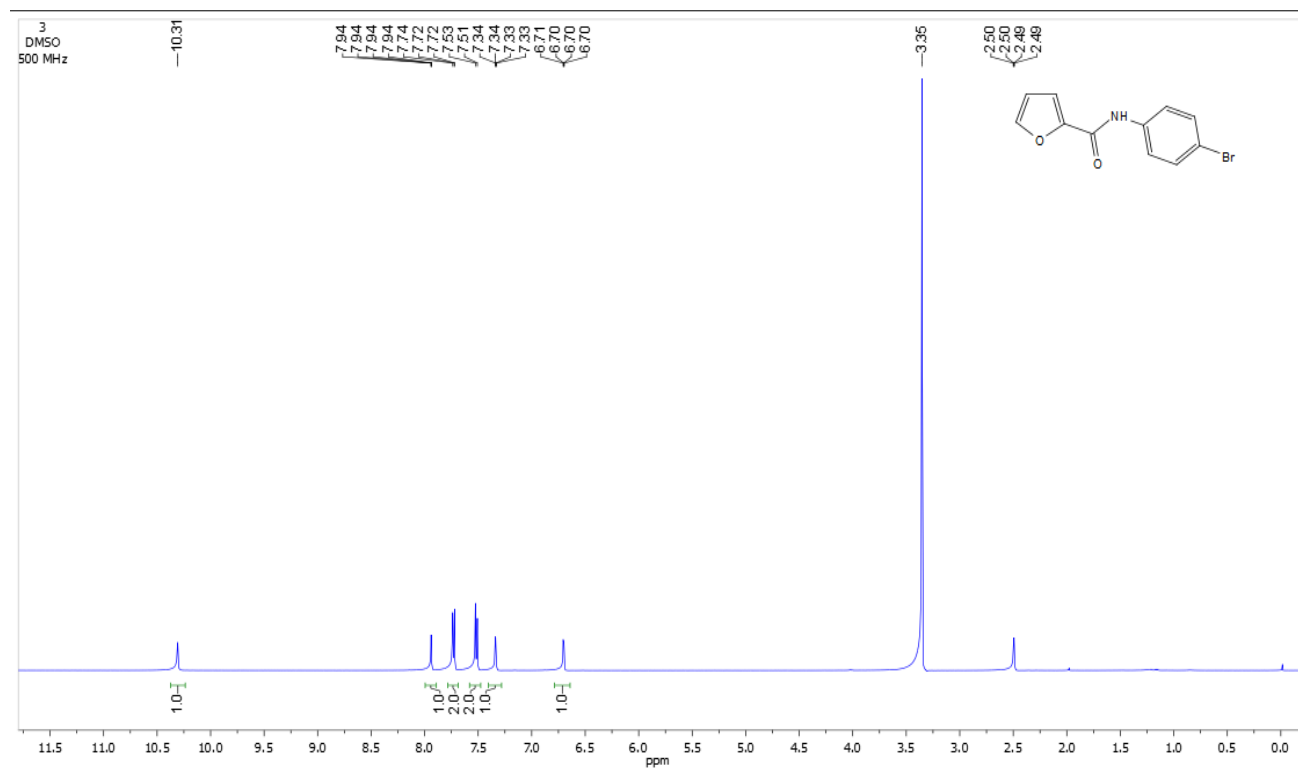

**Figure S1:**  $^1\text{H}$ NMR (500 MHz, DMSO) of compound **3**.

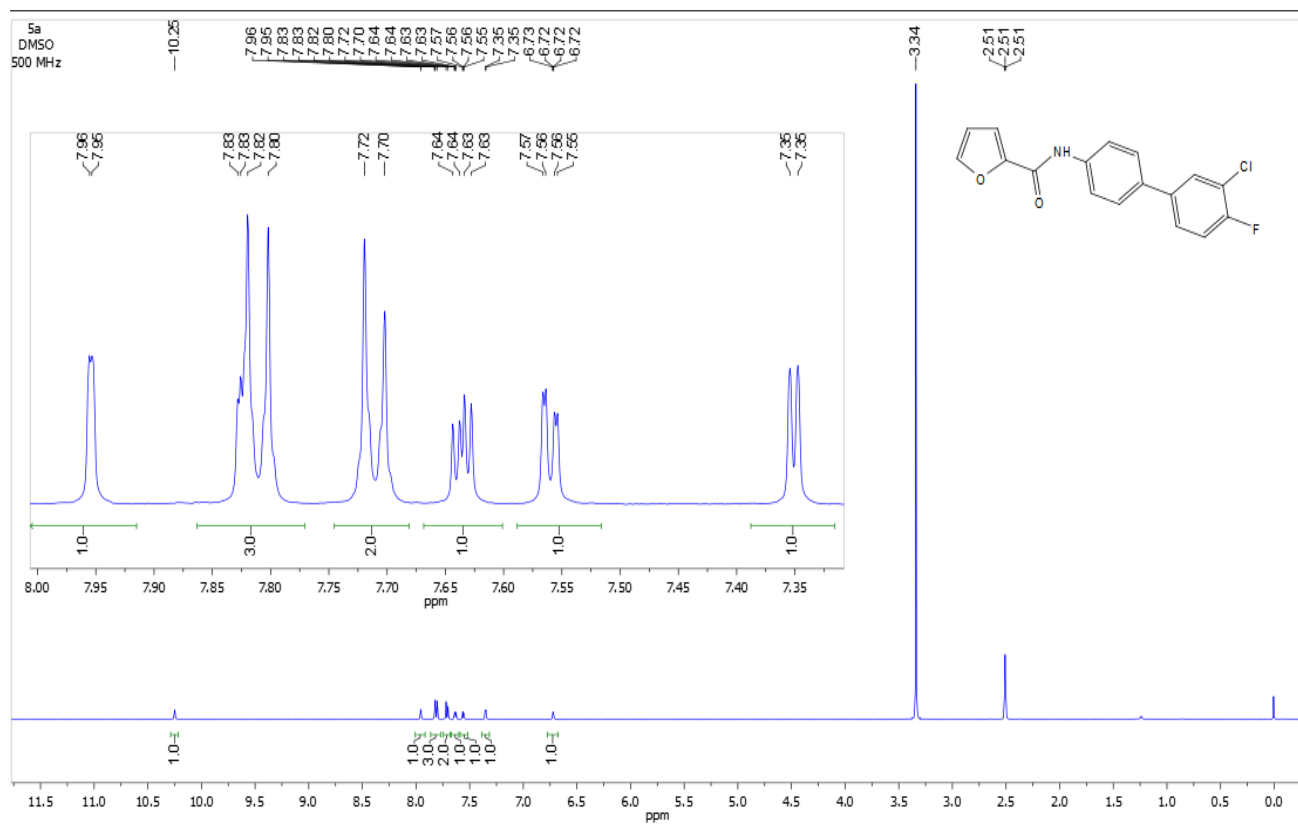

**Figure S2:**  $^1\text{H}$ NMR (500 MHz, DMSO) of compound **5a**.

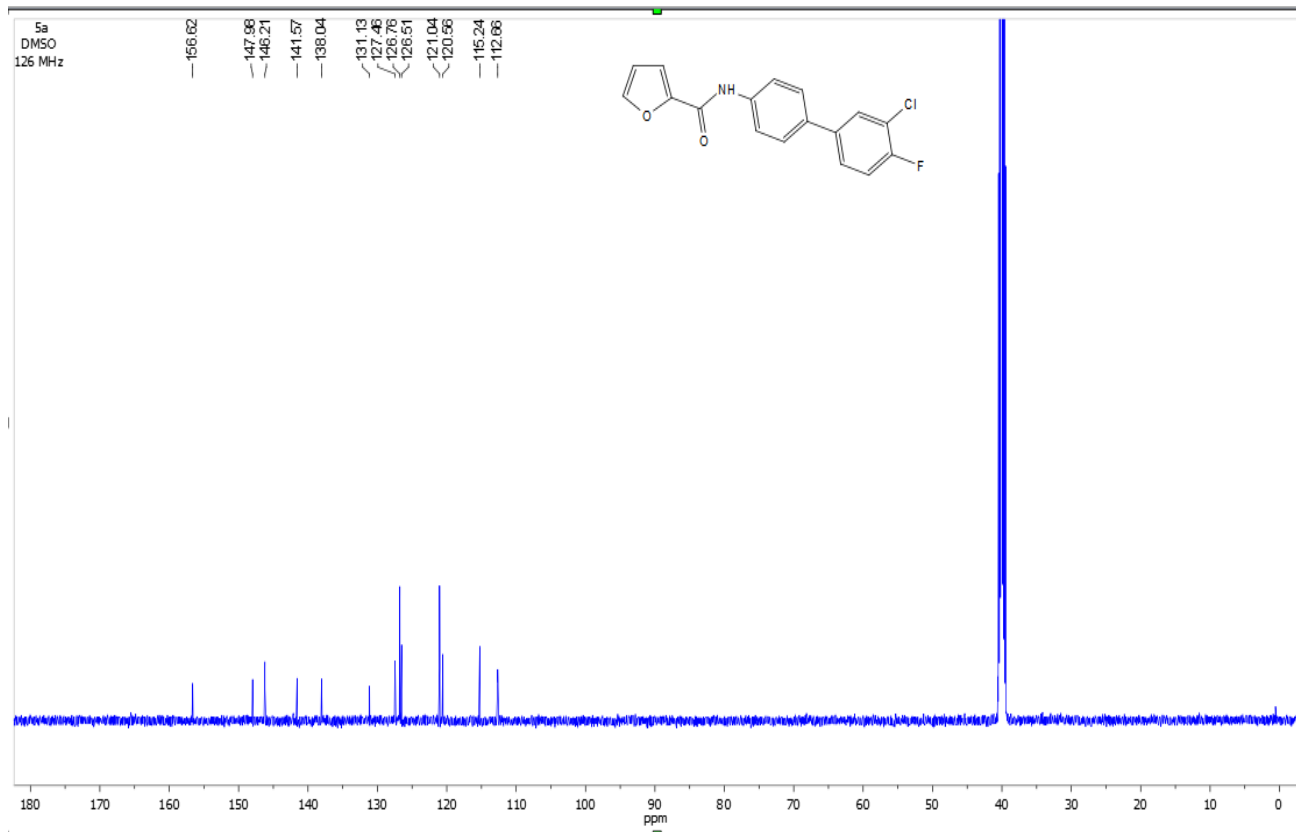

**Figure S3:**  $^{13}\text{C}$ NMR (126 MHz, DMSO) of compound **5a**.

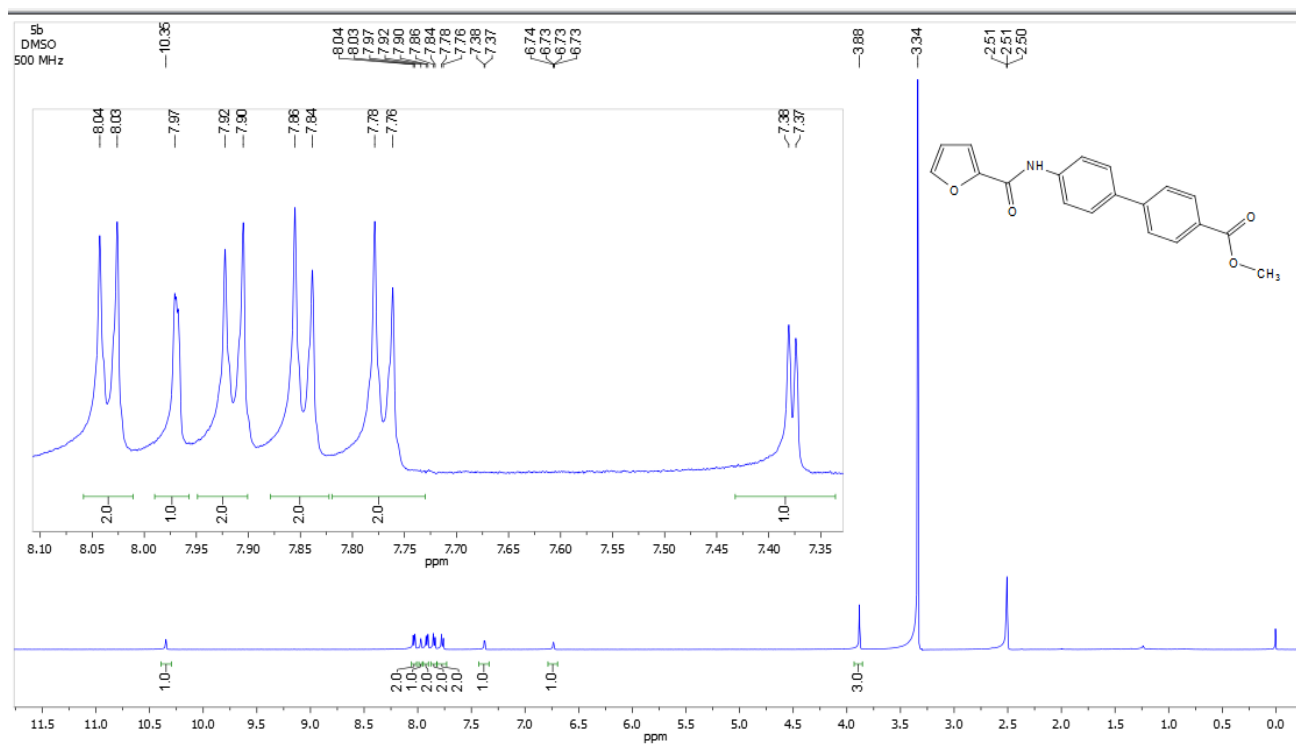

**Figure S4:**  $^1\text{H}$ NMR (500 MHz, DMSO) of compound **5b**.

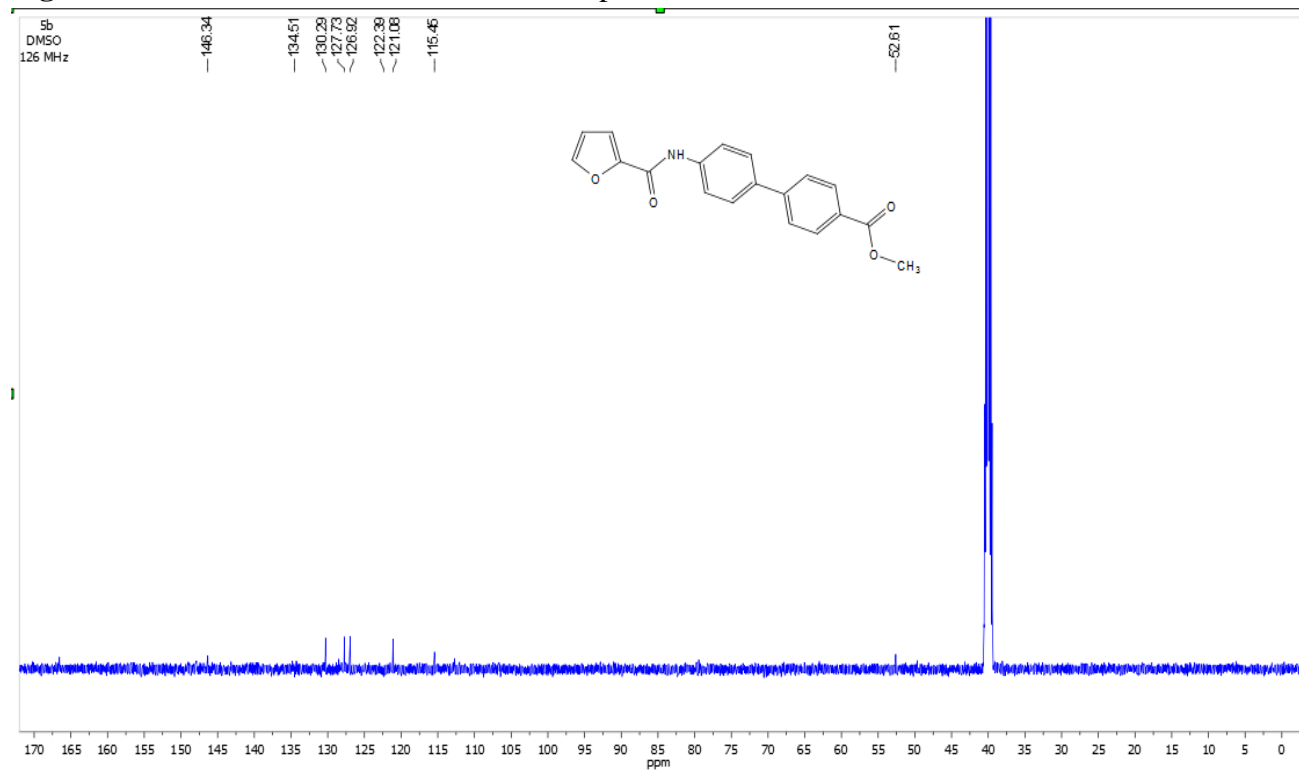

**Figure S5:**  $^{13}\text{C}$ NMR (126 MHz, DMSO) of compound **5b**.

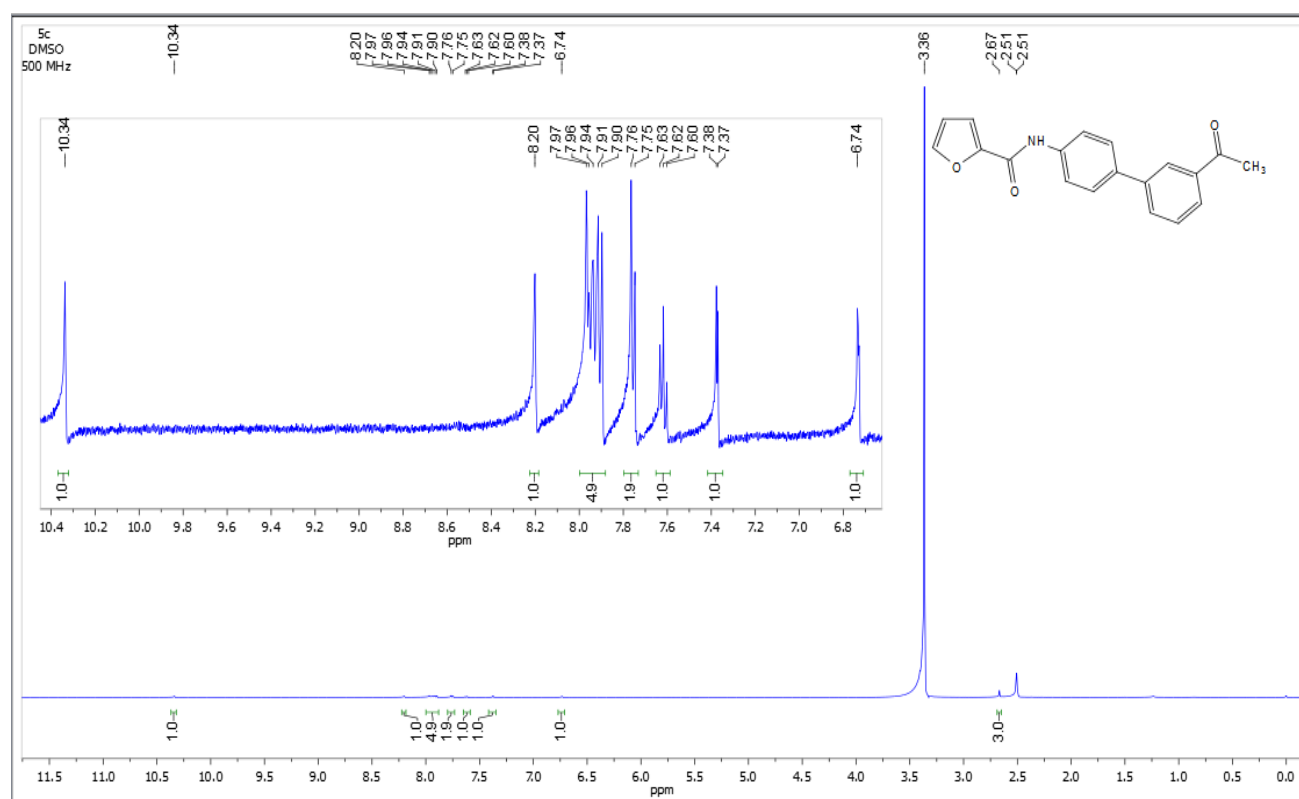

**Figure S6:**  $^1\text{H}$ NMR (500 MHz, DMSO) of compound **5c**.

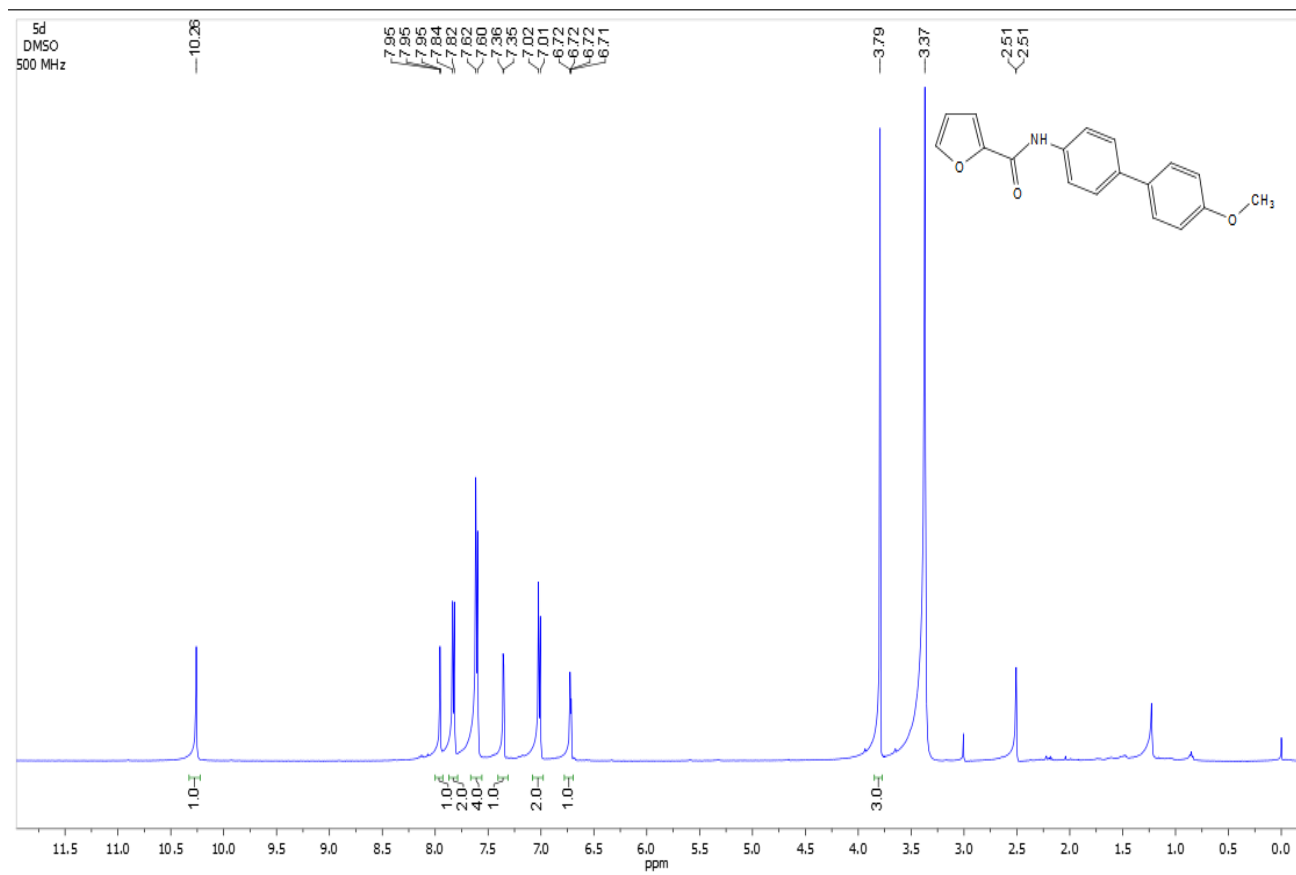

**Figure S7:**  $^1\text{H}$ NMR (500 MHz, DMSO) of compound **5d**.

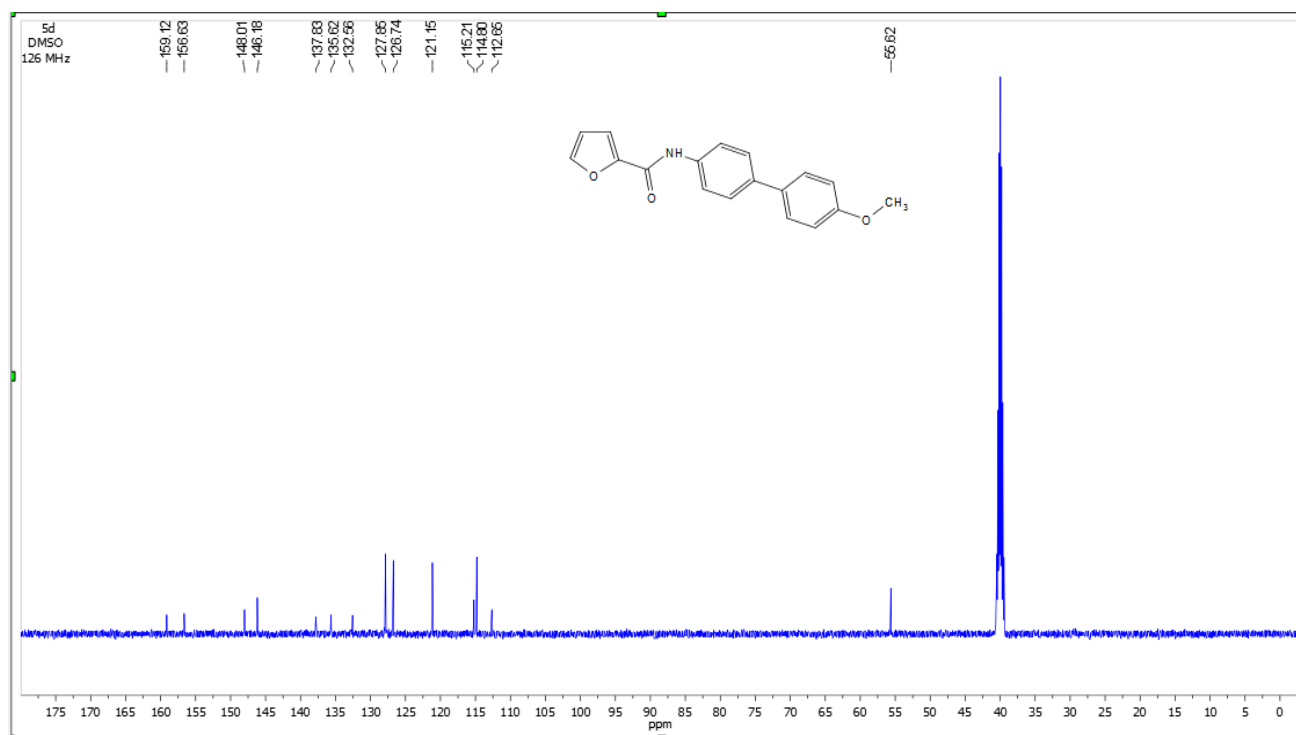

**Figure S8:**  $^{13}\text{C}$ NMR (126 MHz, DMSO) of compound **5d**.

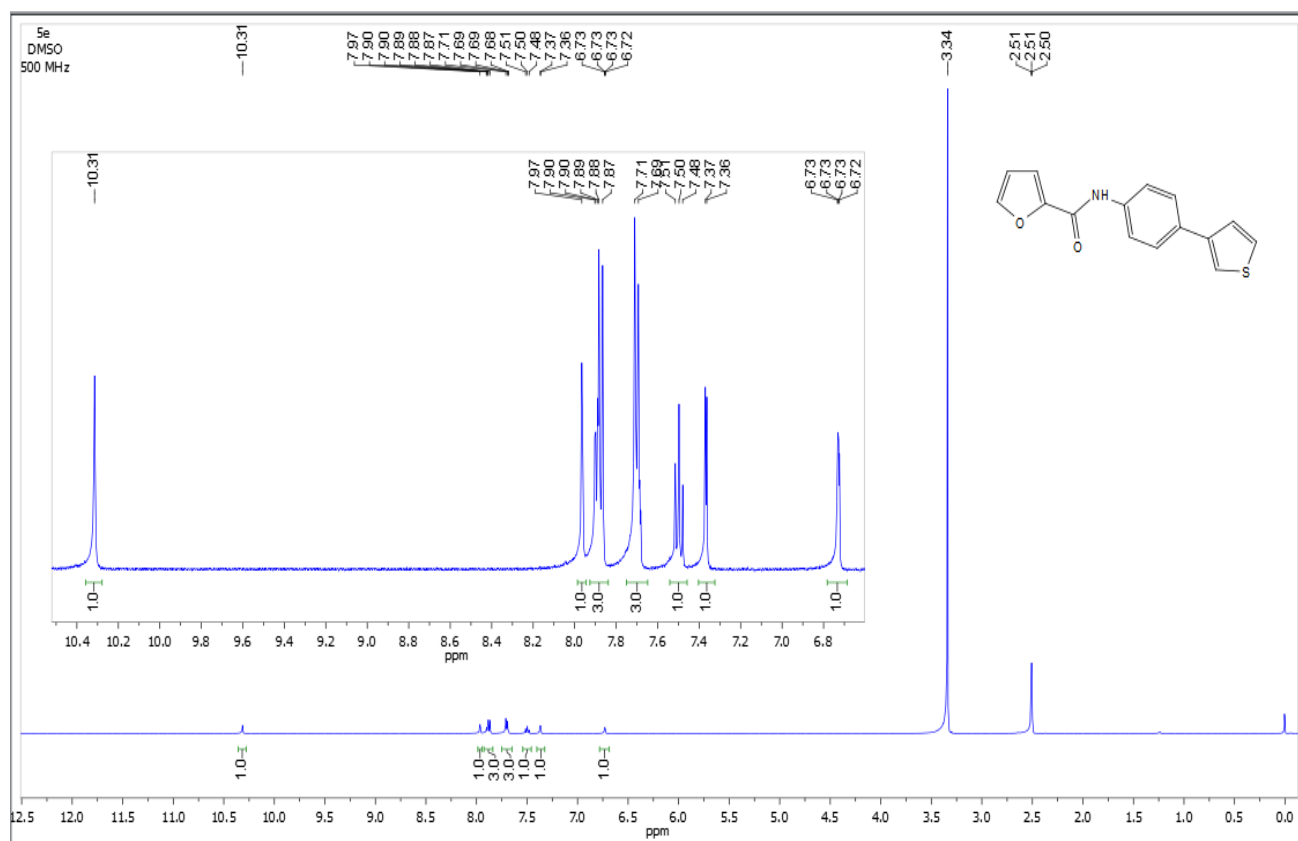

**Figure S9:**  $^1\text{H}$ NMR (500 MHz, DMSO) of compound **5e**.

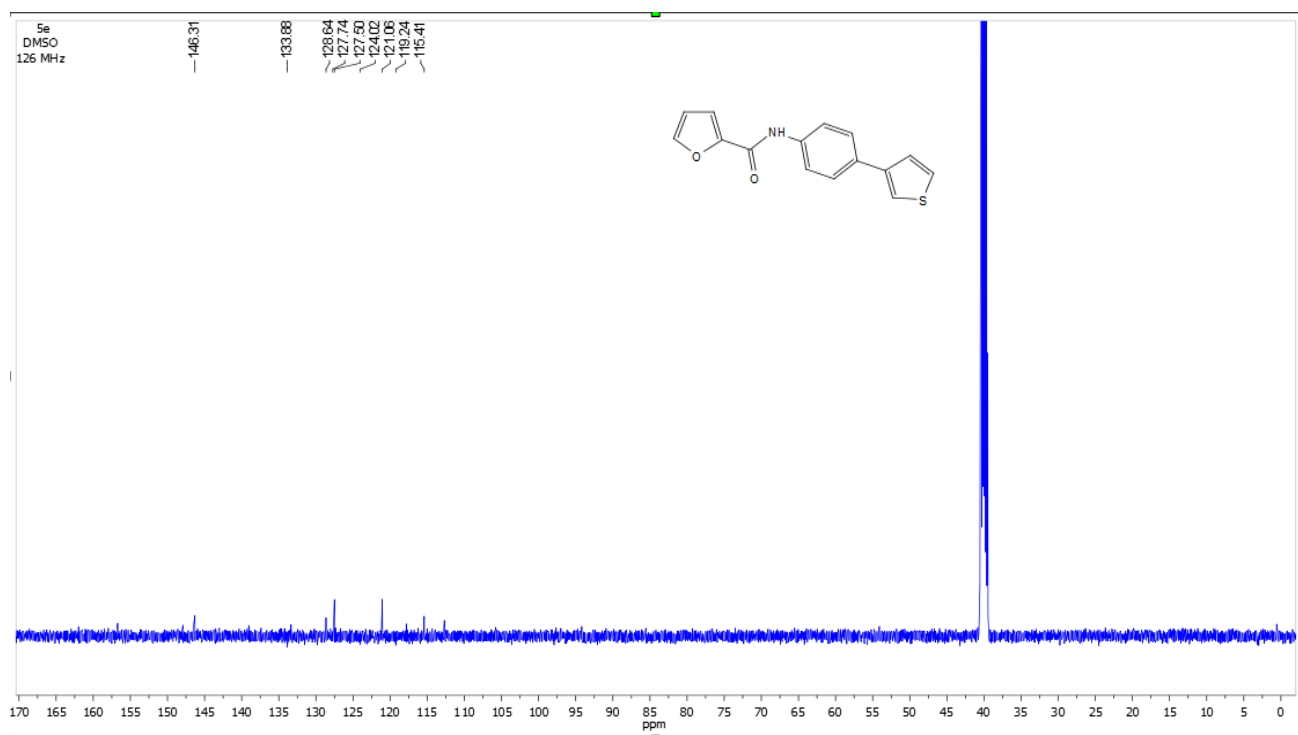

**Figure S10:**  $^{13}\text{C}$ NMR (126 MHz, DMSO) of compound **5e**.

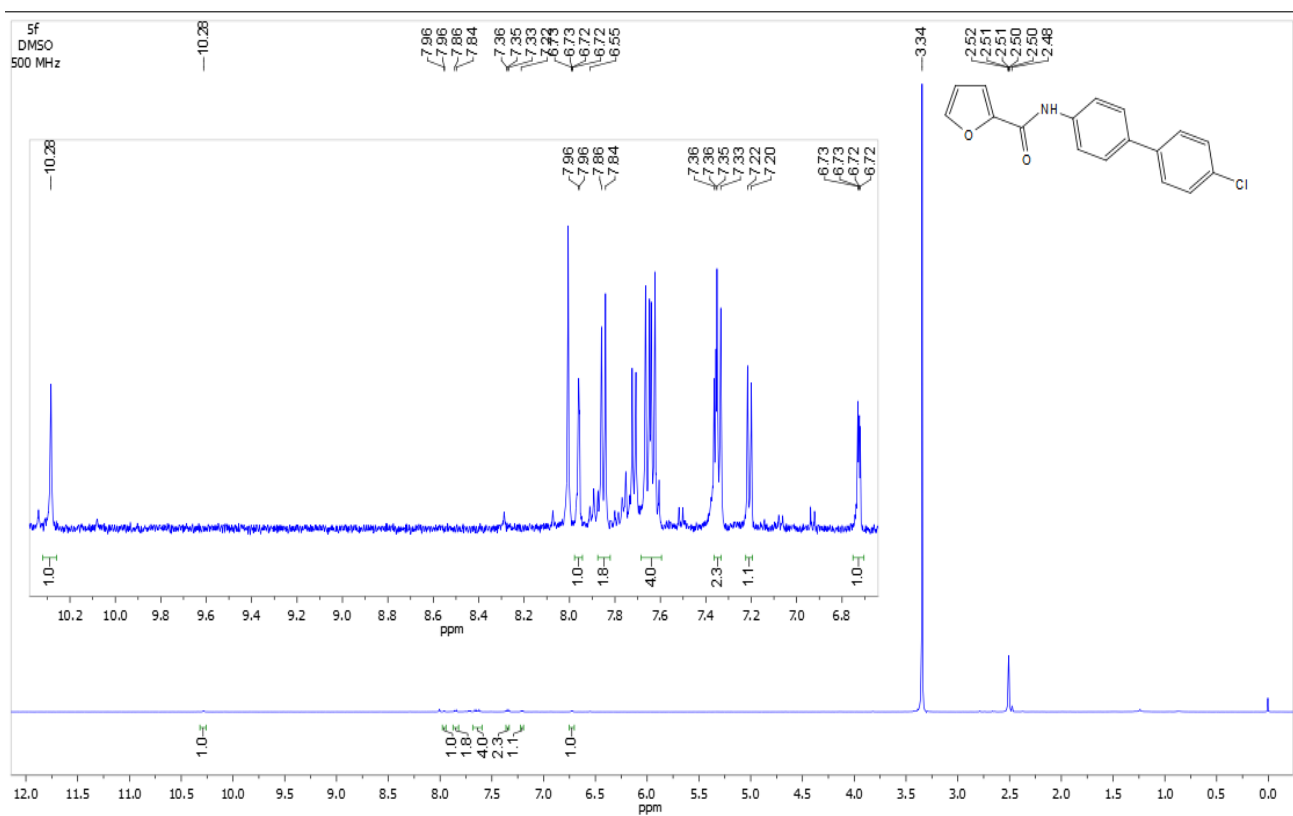

**Figure S11:**  $^1\text{H}$ NMR (500 MHz, DMSO) of compound **5f**.

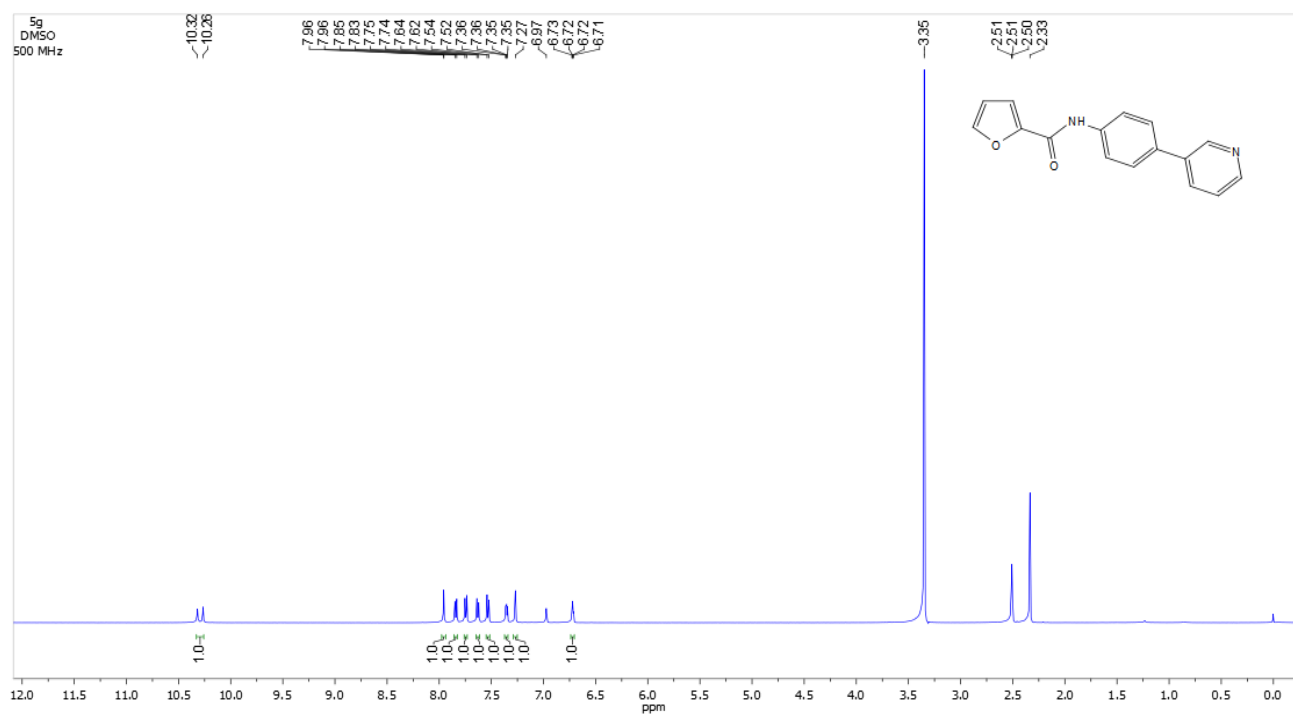

**Figure S12:**  $^1\text{H}$ NMR (500 MHz, DMSO) of compound **5g**.



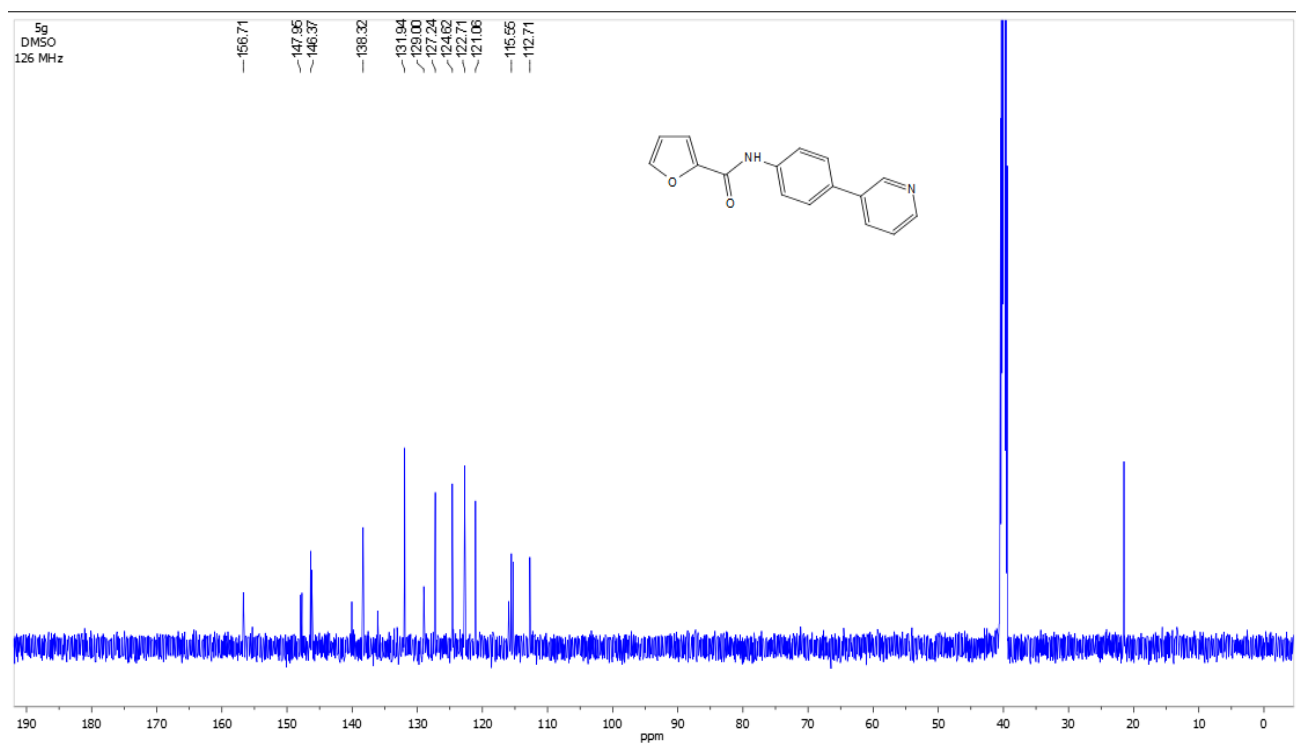

**Figure S13:**  $^{13}\text{C}$ NMR (126 MHz, DMSO) of compound **5g**.

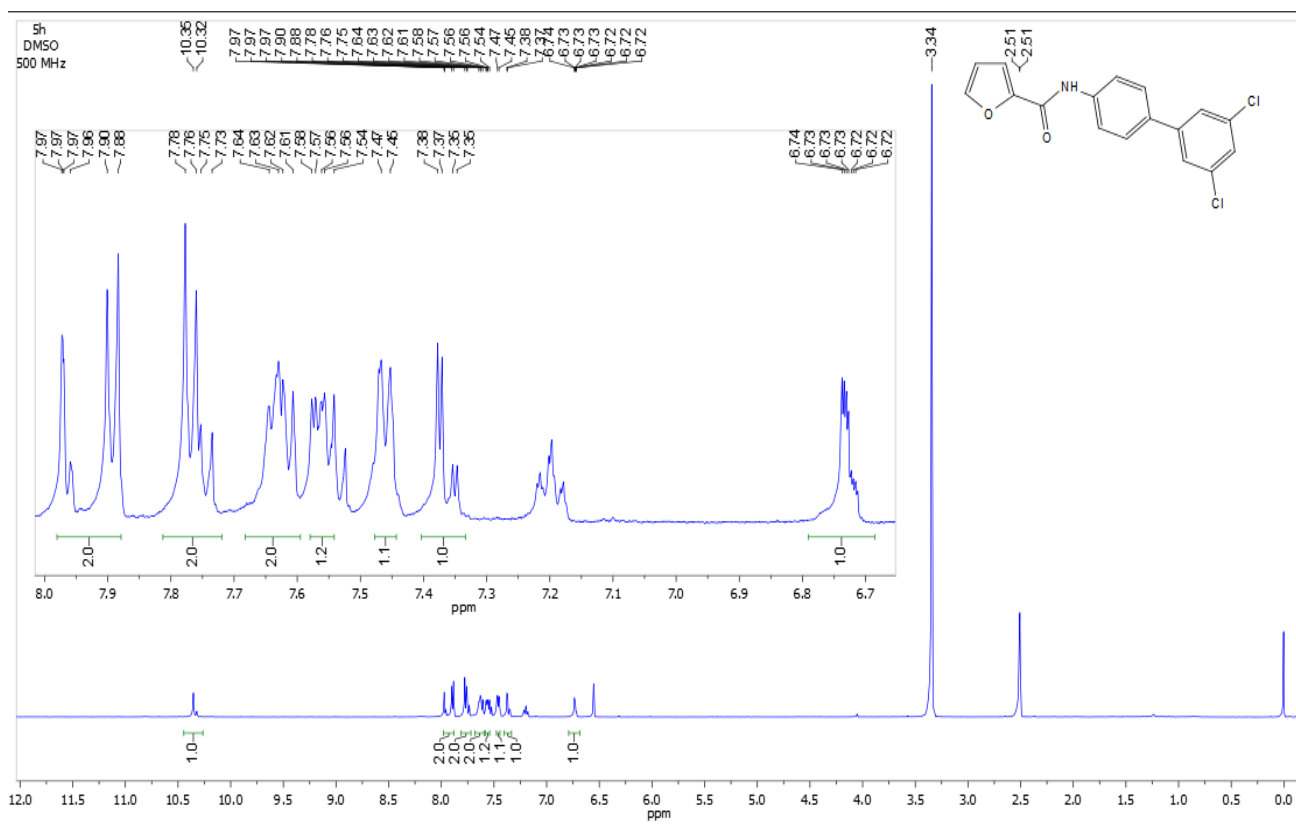

**Figure S14:**  $^1\text{H}$ NMR (500 MHz, DMSO) of compound **5h**.

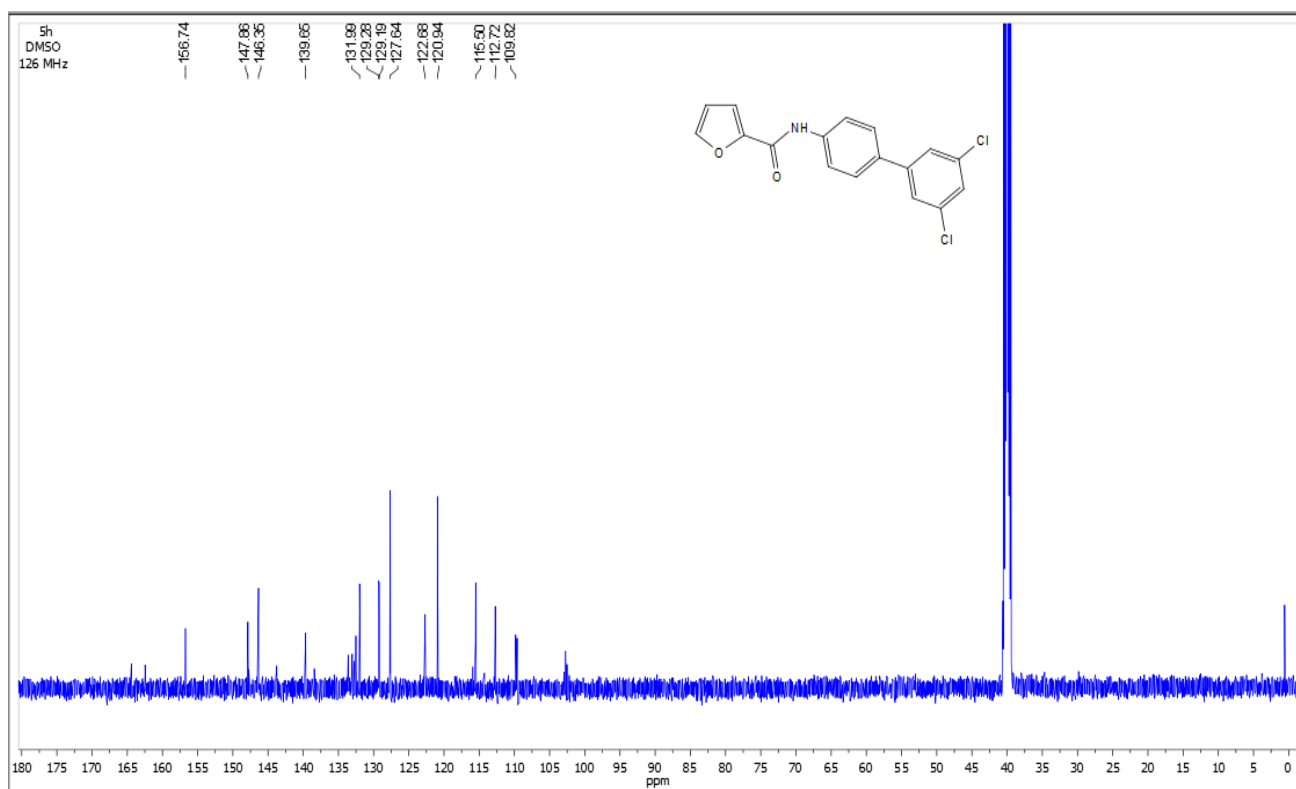

**Figure S15:**  $^{13}\text{C}$ NMR (126 MHz, DMSO) of compound **5h**.

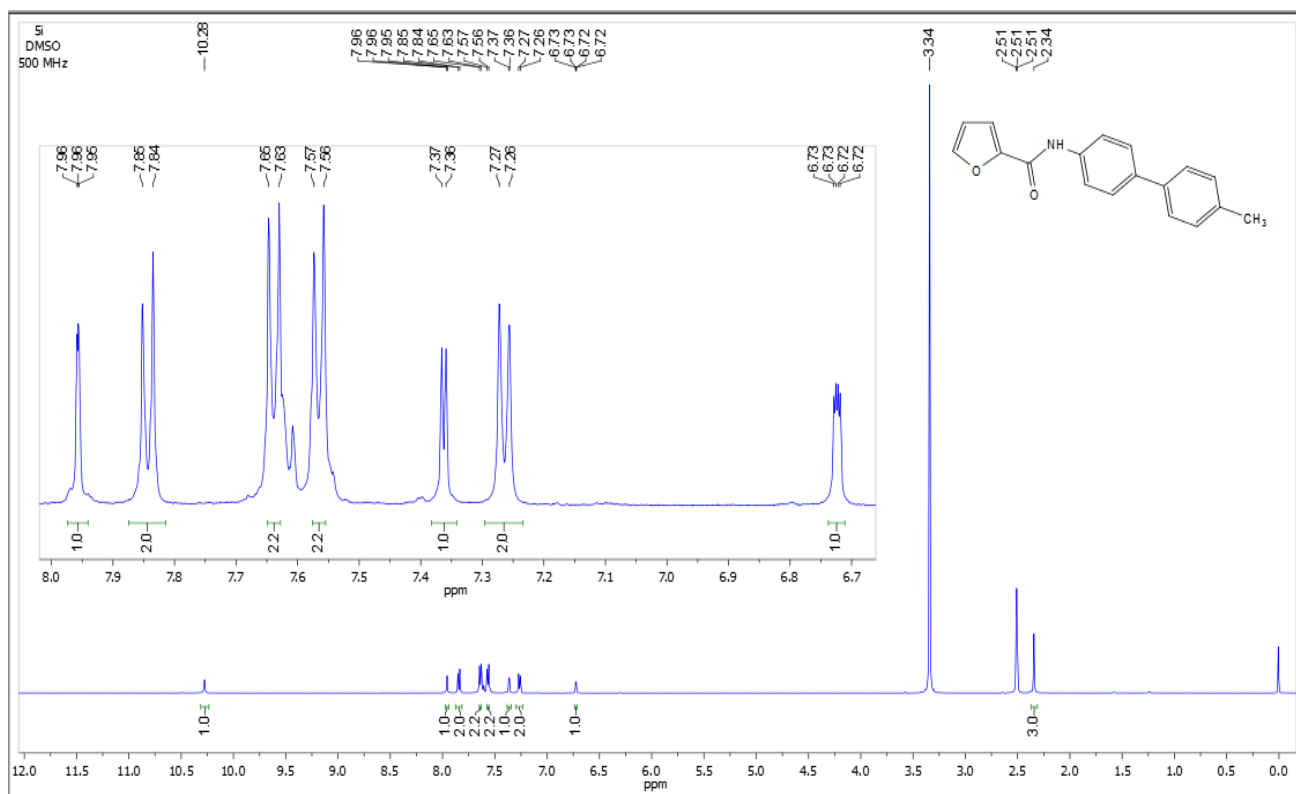

**Figure S16:**  $^1\text{H}$ NMR (500 MHz, DMSO) of compound **5i**.

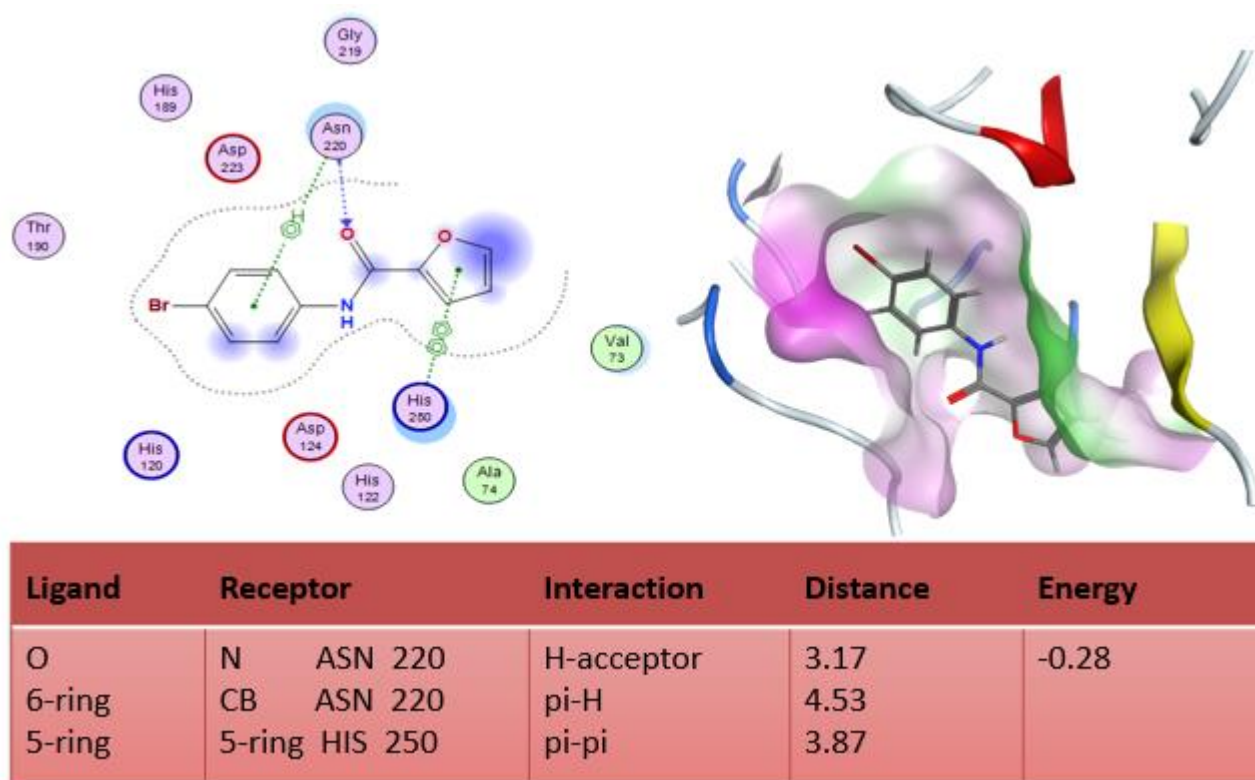

**Figure S17:** Molecular docking and interaction pattern of compound **3**.

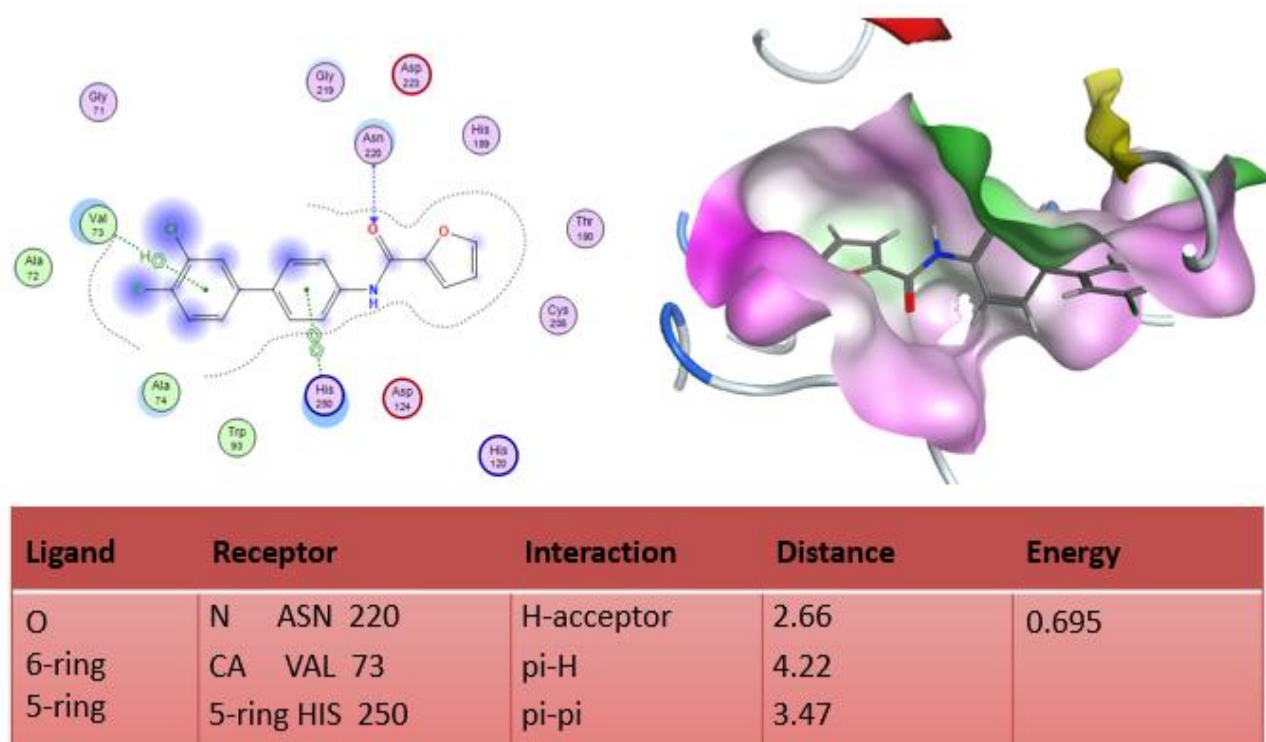

**Figure S18:** Molecular docking and interaction pattern of compound **5a**.

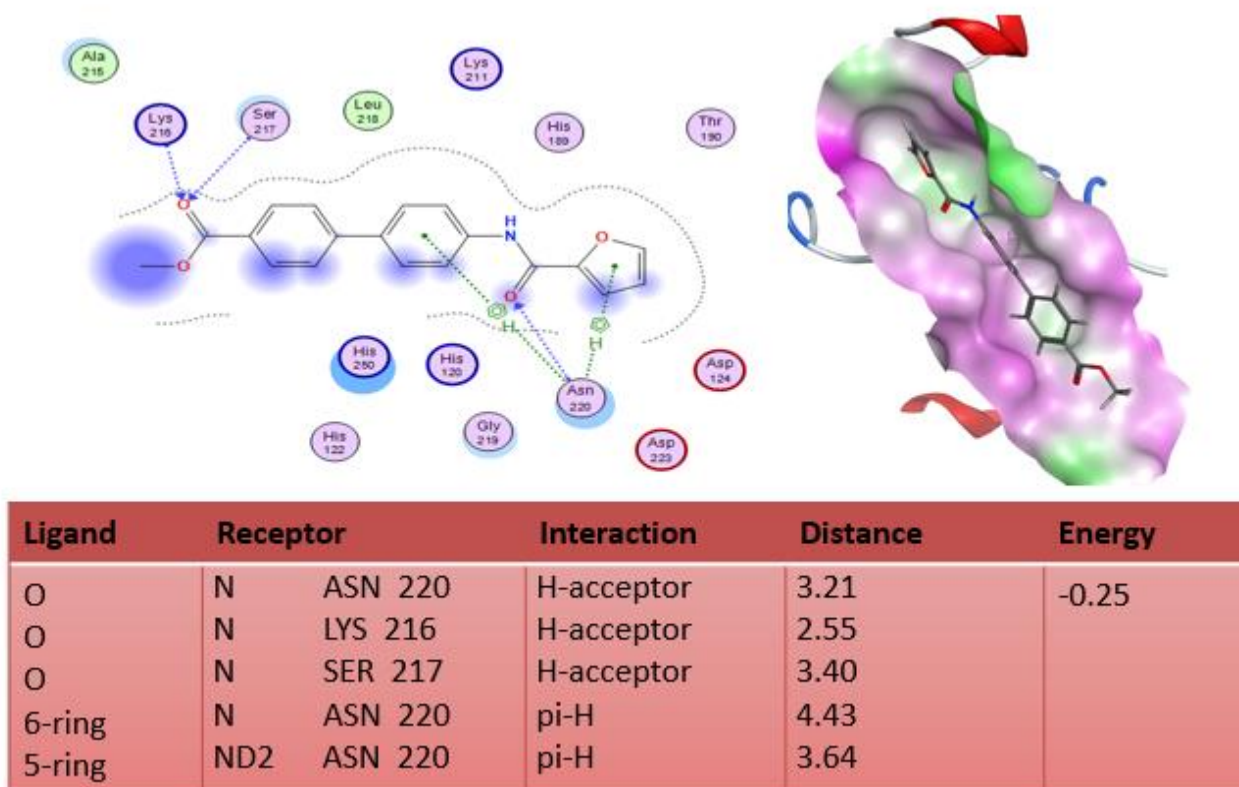

**Figure S19:** Molecular docking and interaction pattern of compound **5b**.

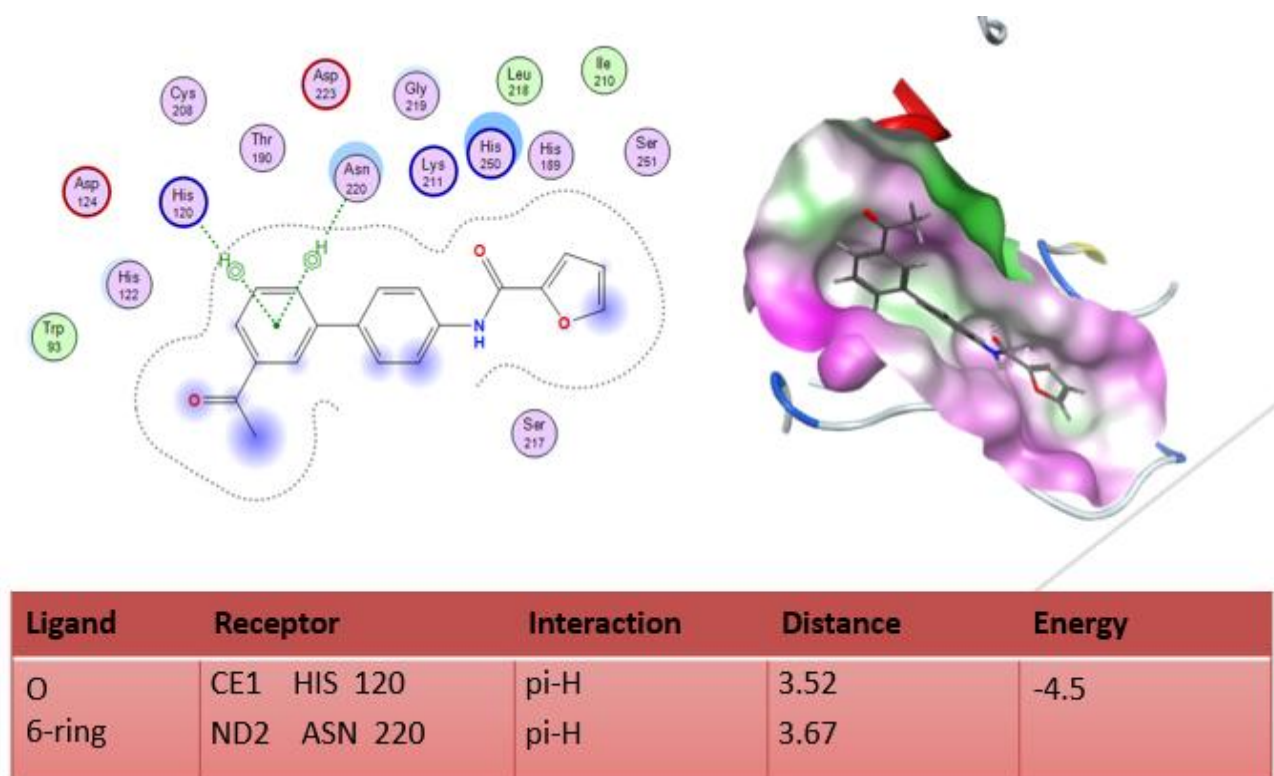

**Figure S20:** Molecular docking and interaction pattern of compound **5c**.



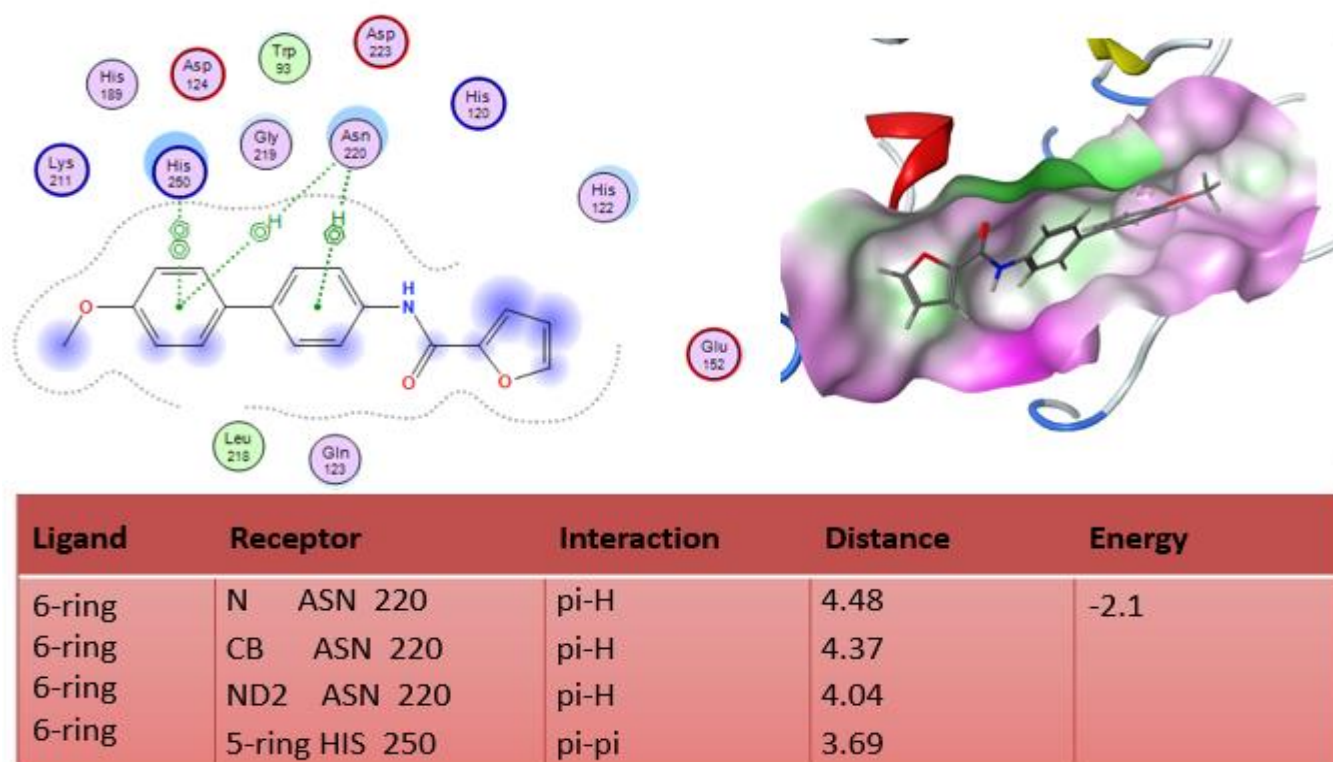

**Figure S21:** Molecular docking and interaction pattern of compound **5d**

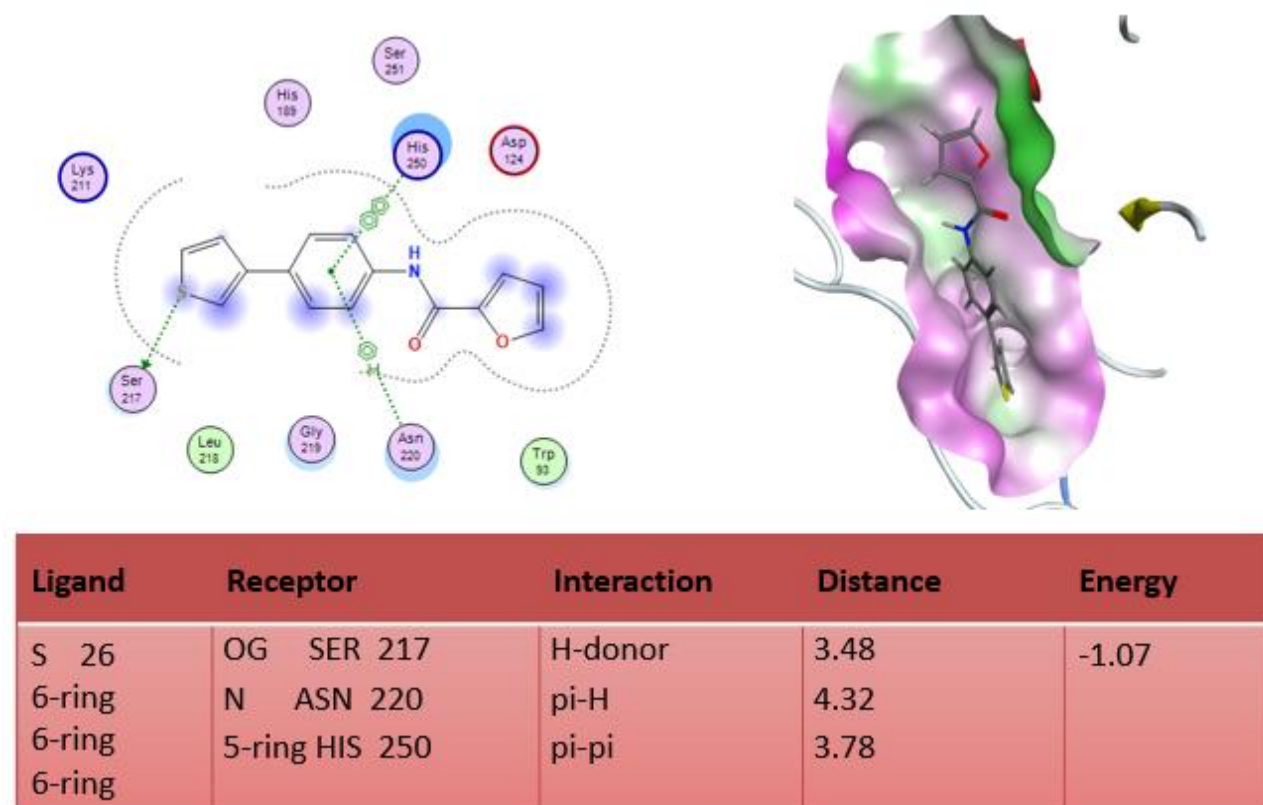

**Figure S22:** Molecular docking and interaction pattern of compound **5e**.

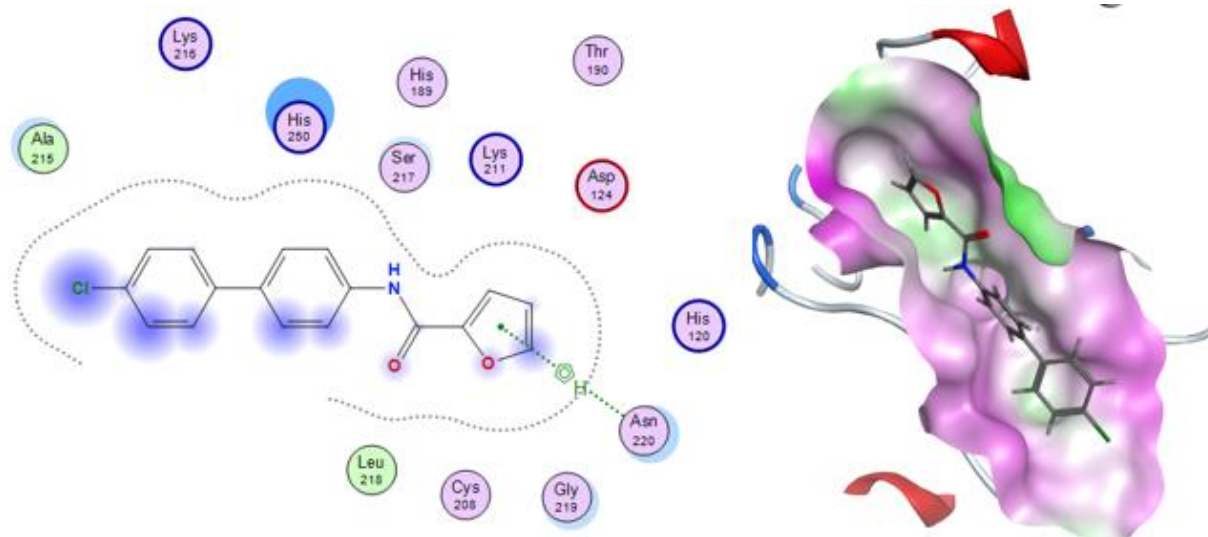

| Ligand | Receptor    | Interaction | Distance | Energy |
|--------|-------------|-------------|----------|--------|
| 6-ring | ND2 ASN 220 | pi-H        | 4.19     |        |

**Figure S23:** Molecular docking and interaction pattern of compound **5f**.

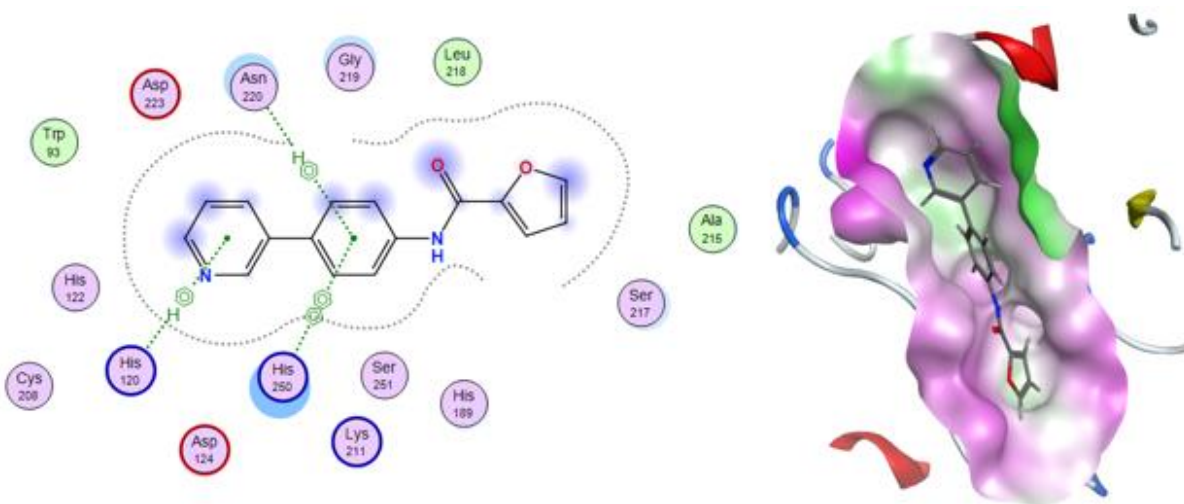

| Ligand | Receptor       | Interaction | Distance | Energy |
|--------|----------------|-------------|----------|--------|
| 6-ring | CE1 HIS 120    | pi-H        | 4.07     | -1.3   |
| 6-ring | N ASN 220      | pi-H        | 4.29     |        |
| 6-ring | 5-ring HIS 250 | pi-pi       | 3.58     |        |

**Figure S24:** Molecular docking and interaction pattern of compound **5g**.

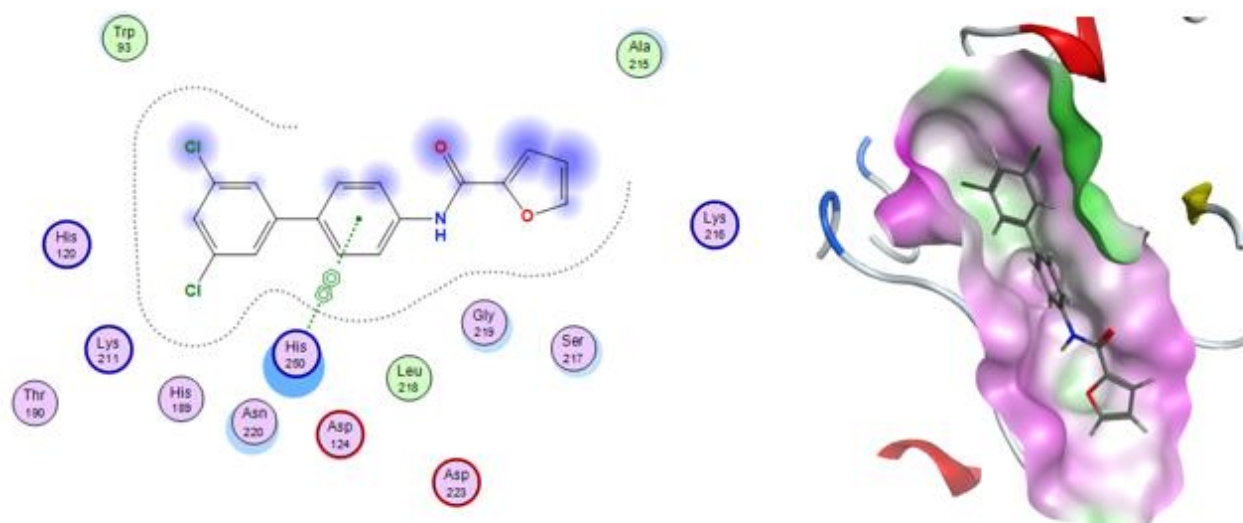

| Ligand | Receptor       | Interaction | Distance | Energy |
|--------|----------------|-------------|----------|--------|
| 6-ring | 5-ring HIS 250 | pi-pi       | 3.92     | -2.17  |

**Figure S25:** Molecular docking and interaction pattern of compound **5h**.

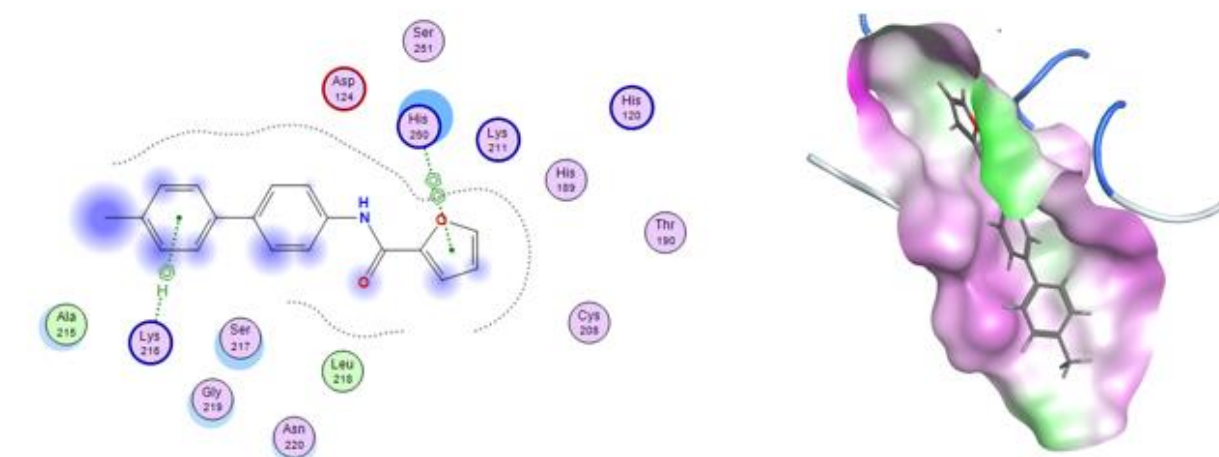

| Ligand | Receptor       | Interaction | Distance | Energy |
|--------|----------------|-------------|----------|--------|
| 6-ring | N LYS 216      | pi-H        | 4.58     | -3.78  |
| 5-ring | 5-ring HIS 250 | pi-pi       | 3.99     |        |

**Figure S26:** Molecular docking and interaction pattern of compound **5i**.

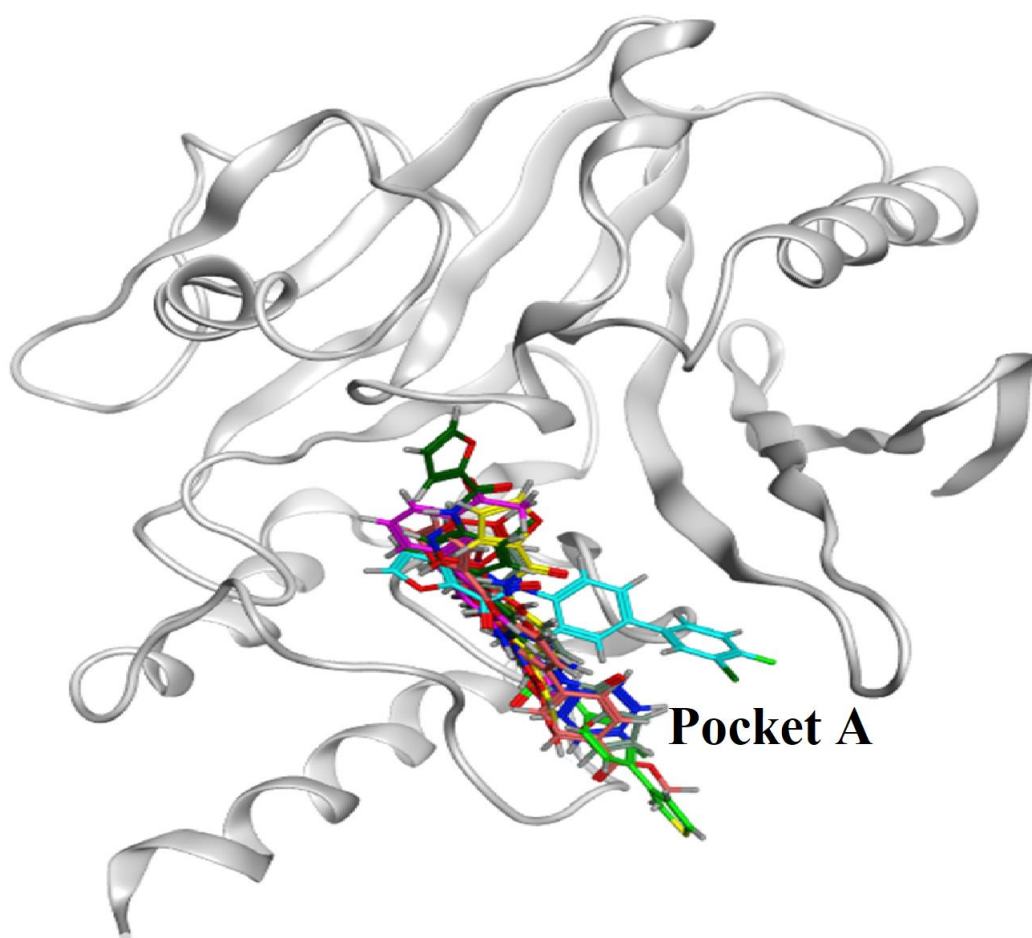

**Figure S27:** The selected conformation of each Ligand (3, 5a-5i) demonstrate binding in the pocket A of NDM-1 protein.



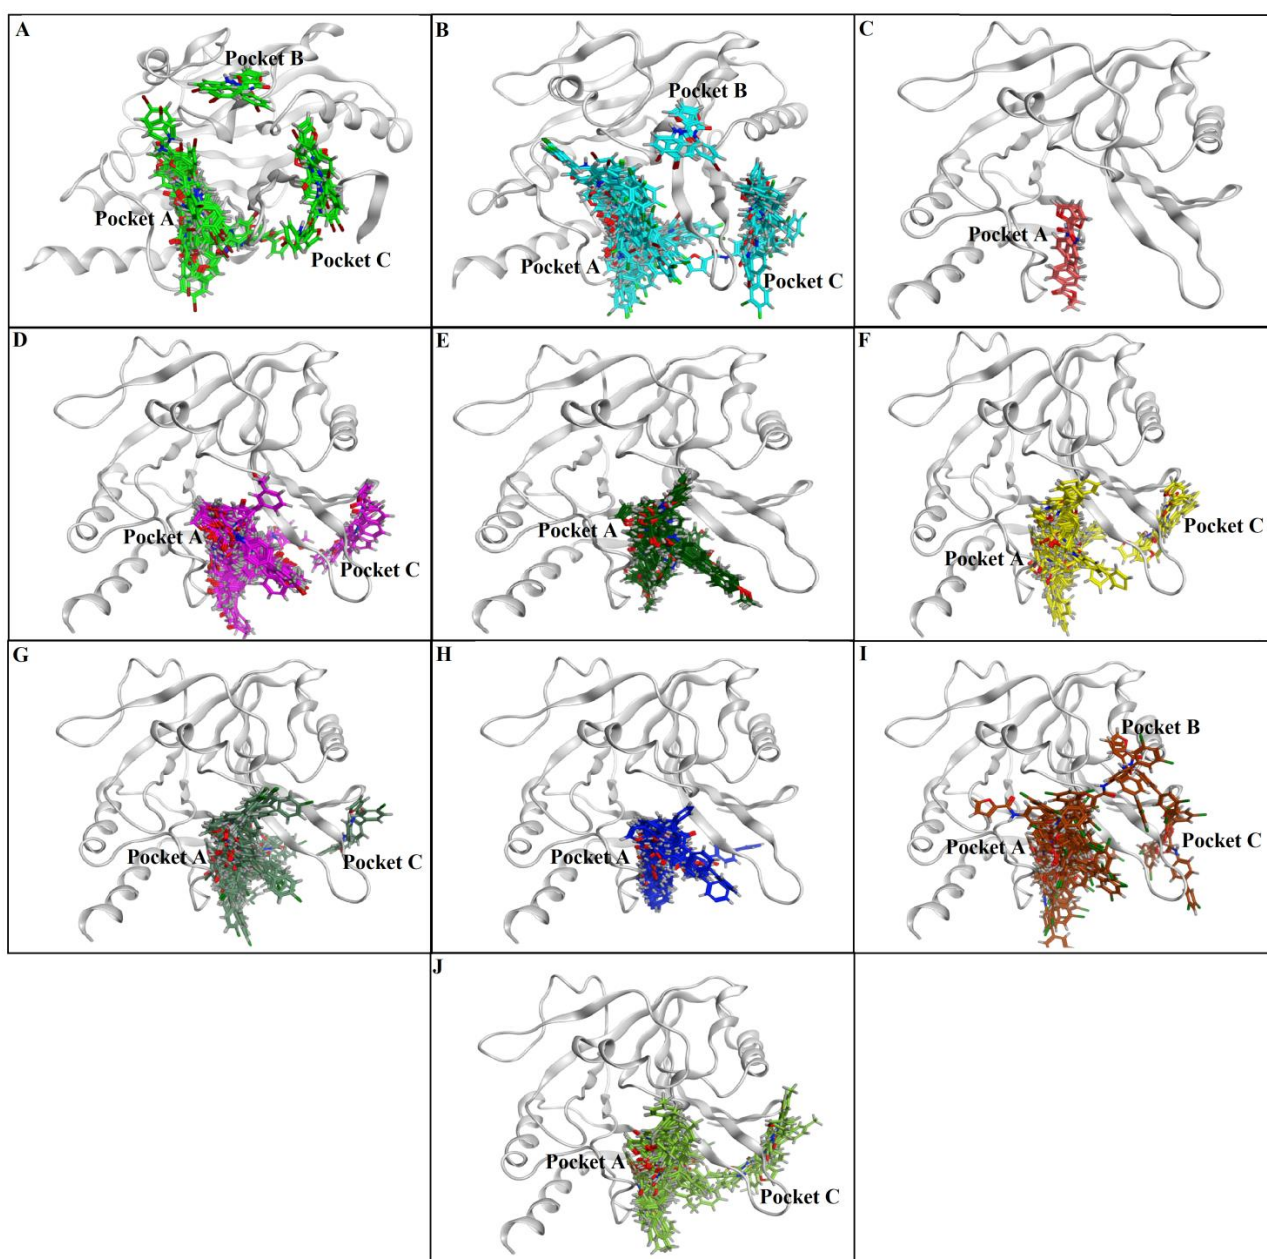

**Figure S28:** Ligand binding to the NDM-1 protein displaying three major binding cavities (Pocket A, Pocket B and Pocket C). It has been clearly observed that for each ligand maximum conformations are occupied in the pocket A of NDM-1 protein. (A)(C) (I) compound 3 , 5b and 5h occupies pocket A, B and C. (C)(H) compound 5b and 5g conformations only occupies pocket A. (D) ( E)(F) (G)(J) Compound 5c, 5d, 5e, 5f and 5i occupies pocket A and C .

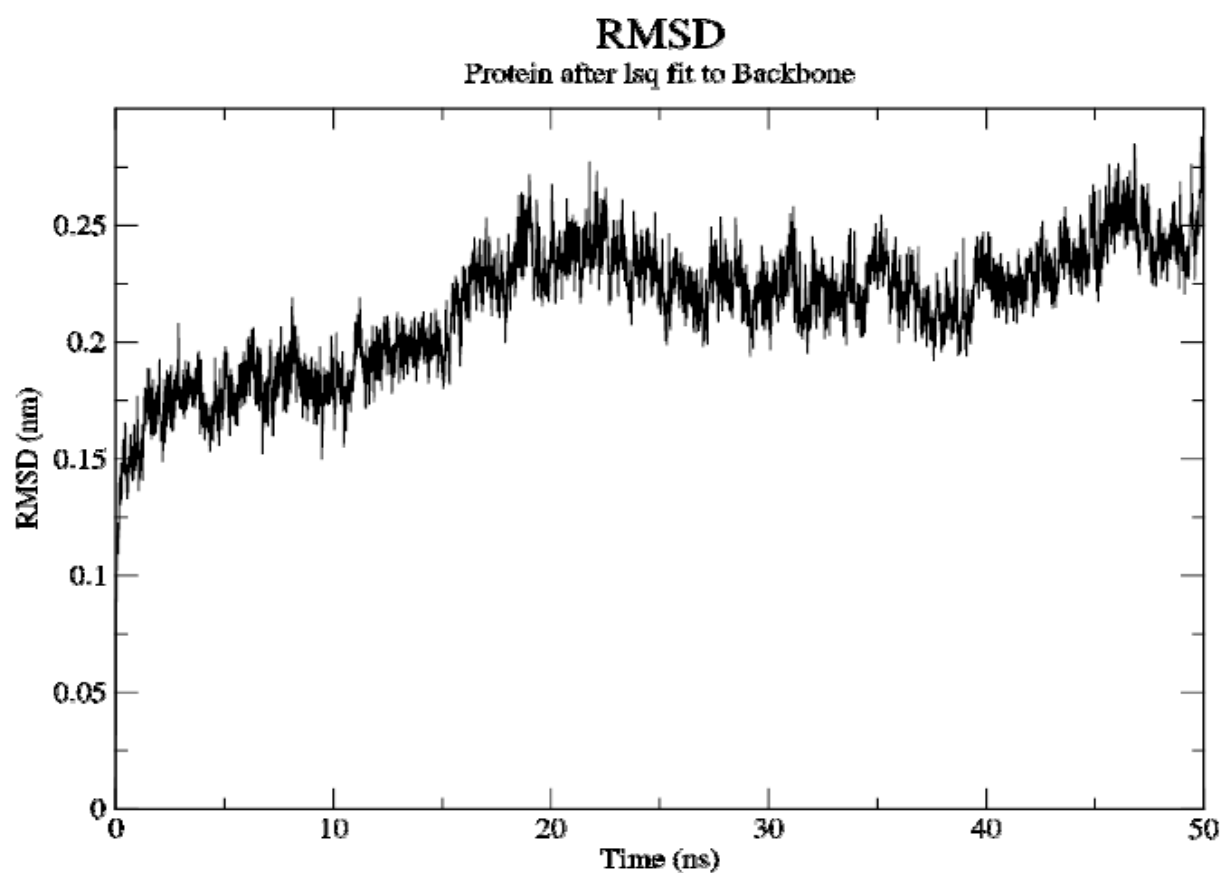

Figure S29: RMSD graph of compound 3.

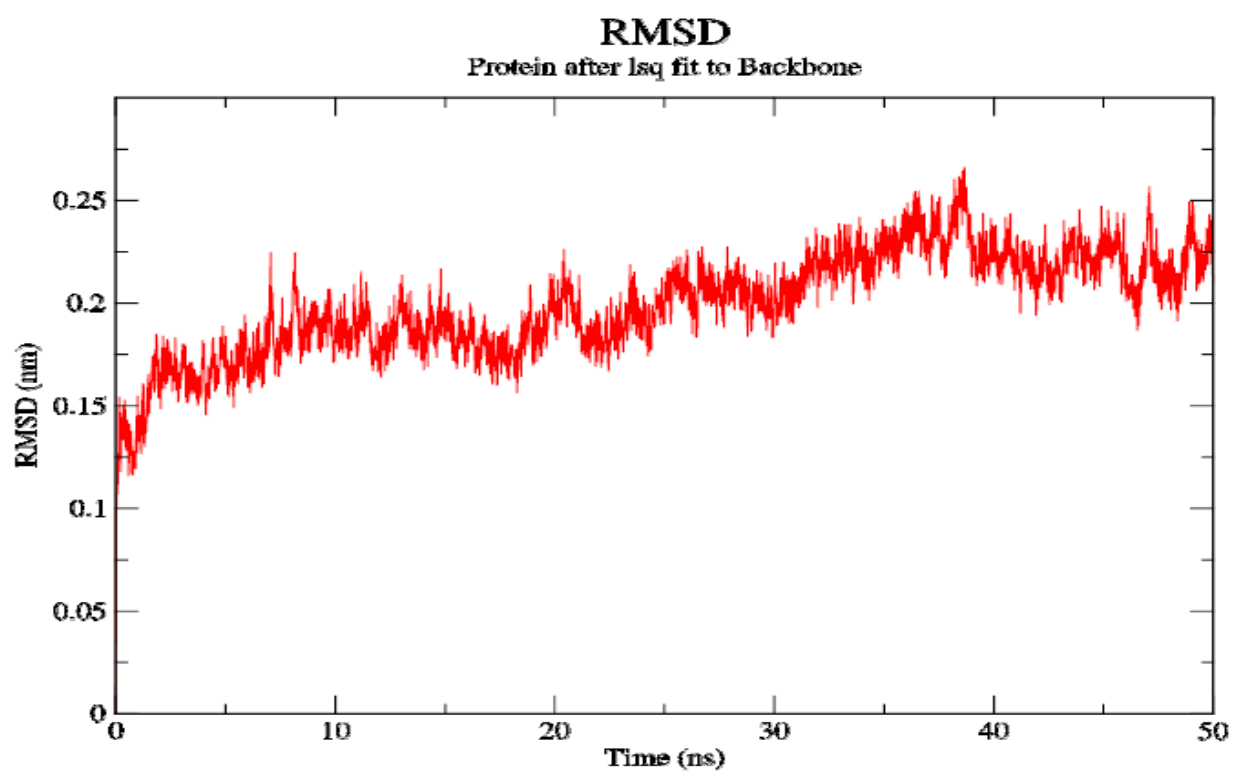

Figure S30: RMSD graph of compound 5c.

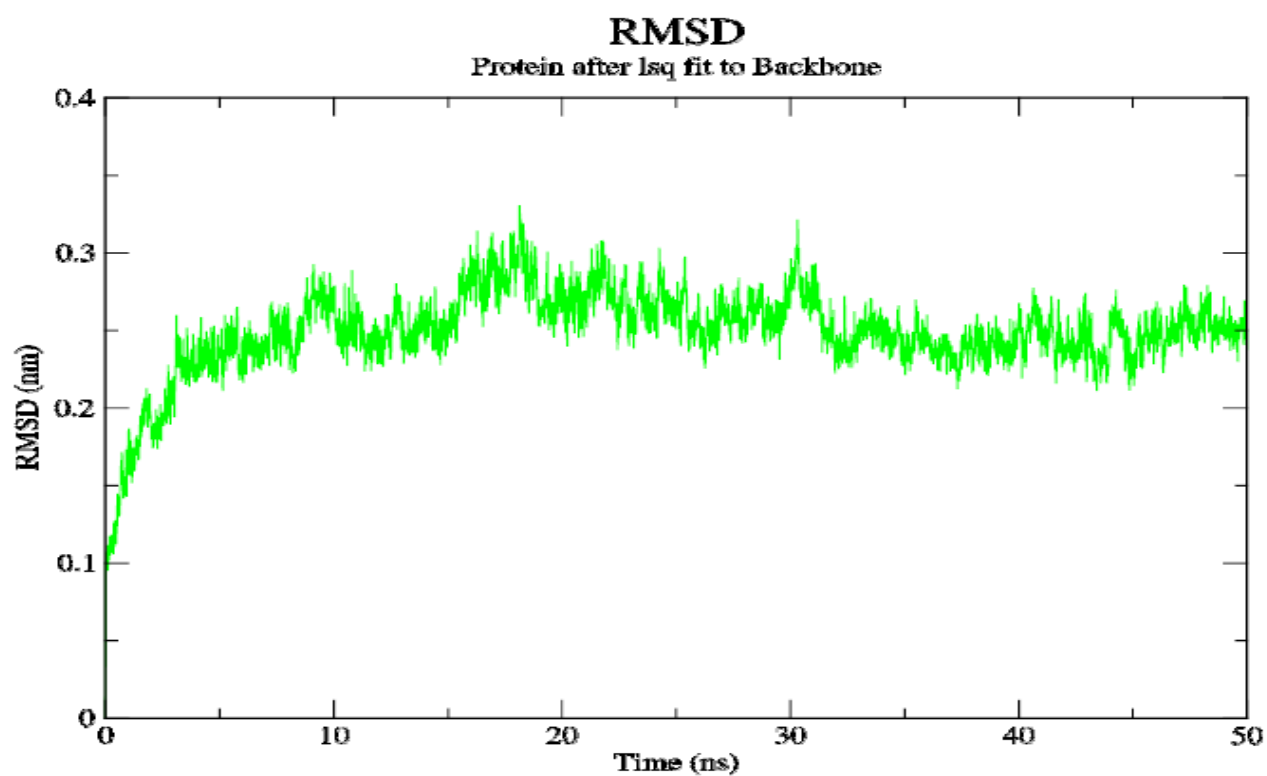

**Figure S31:** RMSD graph of compound **5g**.

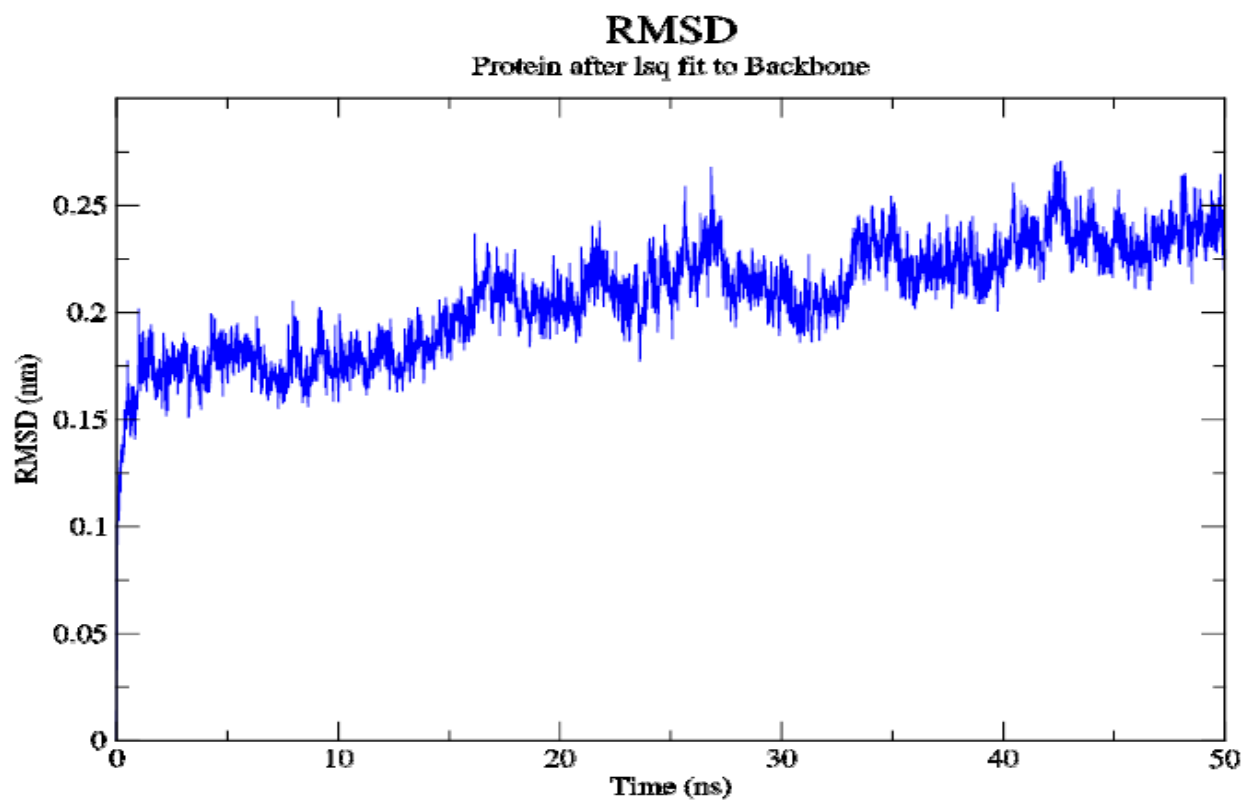

**Figure S32:** RMSD graph of compound **5h**.

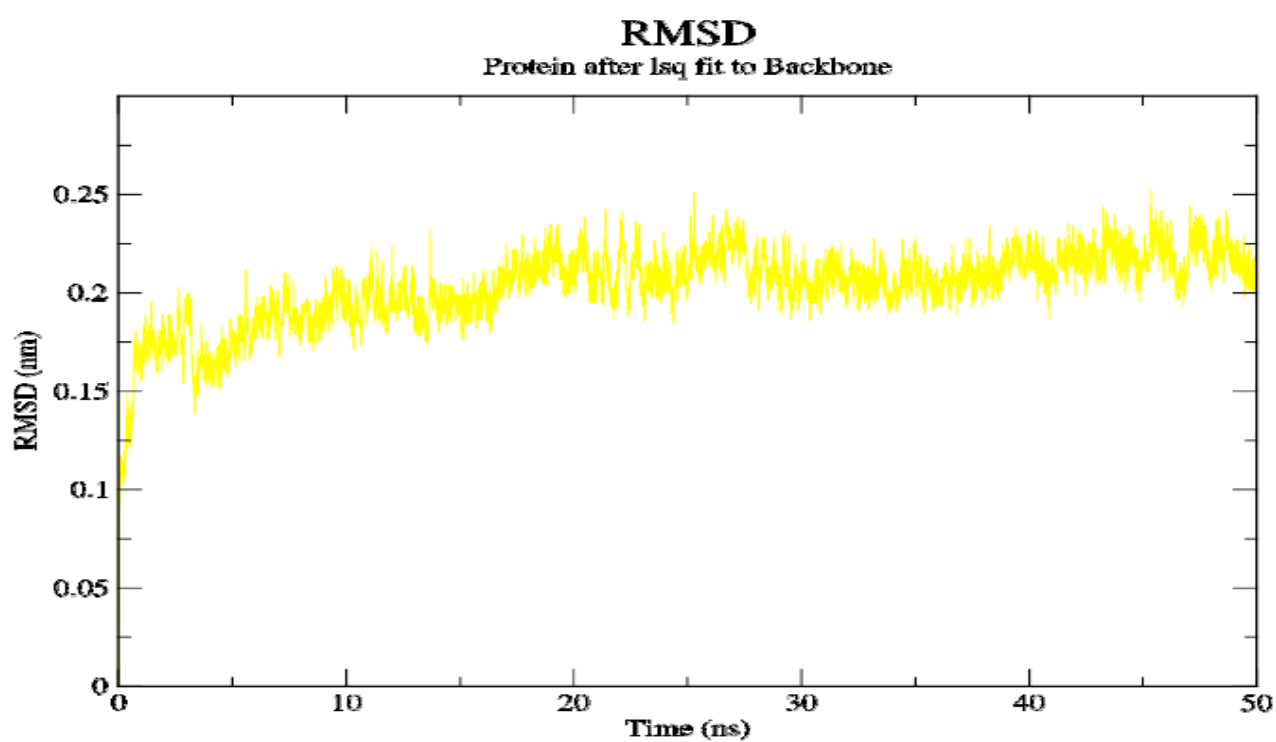

**Figure S33:** RMSD graph of compound **5i**.

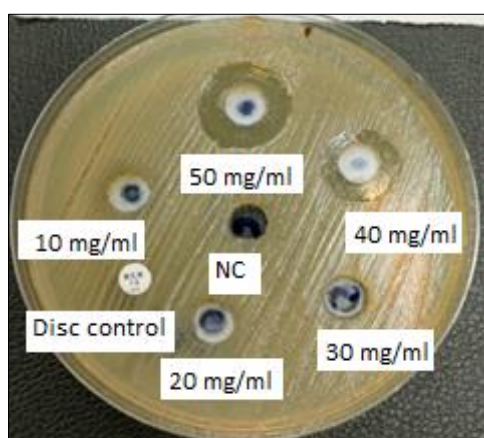

**CRAB**

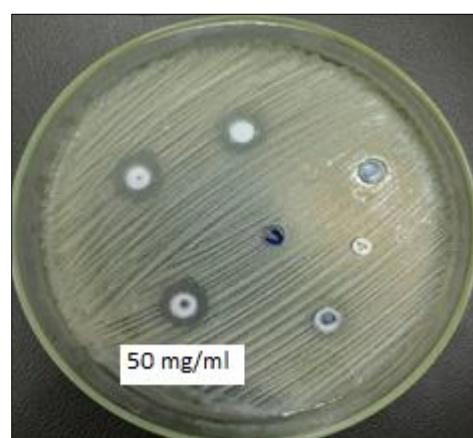

**CREC**

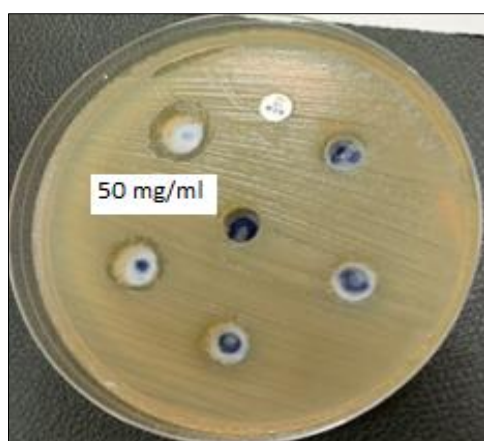

**CRKP**

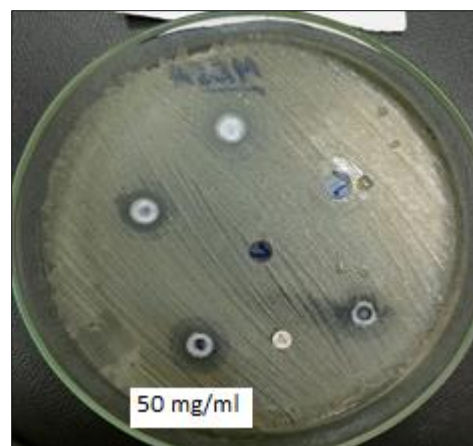

**MRSA**

**Figure S34.** Antibacterial activity of **(3)** against XDR pathogens.

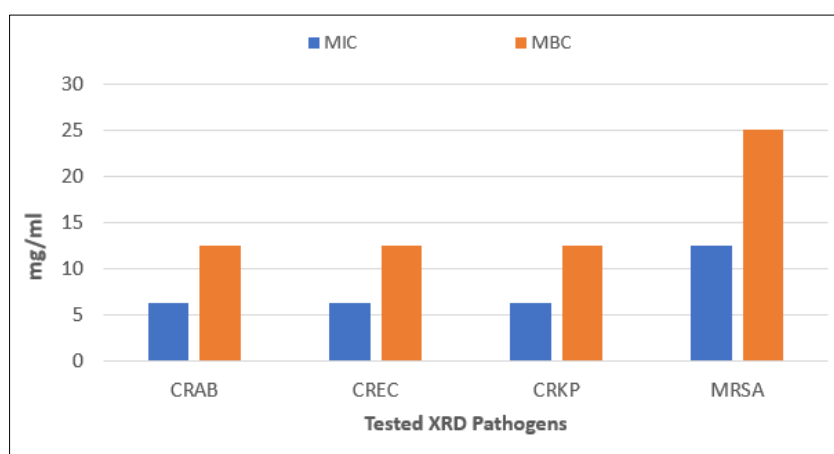

**Figure S35.** MIC (mg/ml) and MBC of compound **(3)** against XDR pathogens.

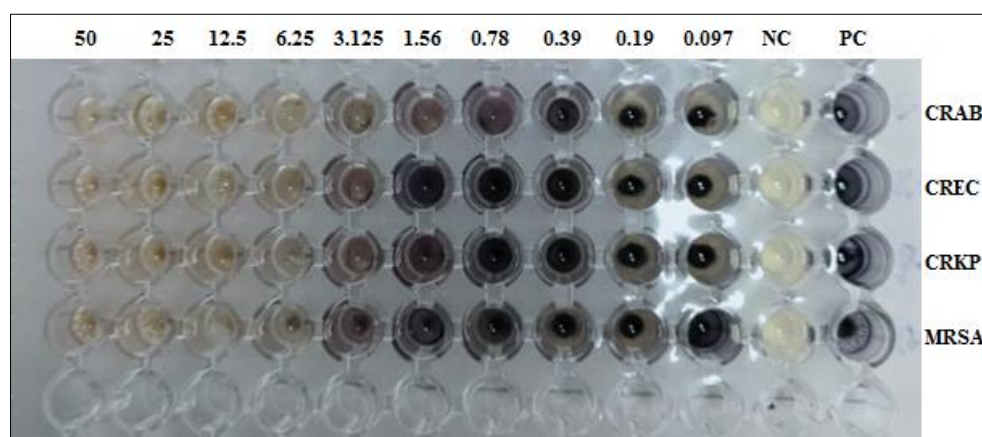

NC: Negative control; PC: Positive control

**Figure S36.** MIC of **3** compound against XDR pathogens
